1 **Extreme Y chromosome polymorphism corresponds to five male reproductive**  
2 **morphs**

3  
4  
5 Benjamin A Sandkam<sup>a\*</sup>, Pedro Almeida<sup>b</sup>, Iulia Darolti<sup>a</sup>, Benjamin Furman<sup>a</sup>, Wouter van  
6 der Bijl<sup>a</sup>, Jake Morris<sup>b</sup>, Godfrey Bourne<sup>c</sup>, Felix Breden<sup>d</sup>, Judith E. Mank<sup>a,b</sup>

7 a. Department of Zoology, University of British Columbia, Vancouver, BC V6T 1Z4,  
8 Canada

9 b. Department of Genetics, Evolution and Environment, University College London,  
10 London WC1E 6BT, United Kingdom

11 c. Department of Biology, University of Missouri-St. Louis, St. Louis, MO 63105, USA

12 d. Department of Biological Sciences, Simon Fraser University, Burnaby, BC V5A 1S6,  
13 Canada

14  
15 \* **Corresponding Author:** Benjamin A Sandkam

16 **Email:** [sandkam@zoology.ubc.ca](mailto:sandkam@zoology.ubc.ca)

17  
18 **Keywords**

19 Genome Evolution, Alternative Mating Tactics, *Poecilia parae*, Supergene

20  
21 **Author Contributions**

22 B.A.S. and J.E.M. designed research; B.A.S., J.E.M, F.B., G.R.B. conducted field work;  
23 B.A.S., P.A., I.A., B.L.S.F., W.v.d.B., and J.M. conducted bioinformatic analyses; B.A.S.,  
24 P.A., I.A., B.L.S.F., W.v.d.B., J.M., G.R.B., F.B. and J.E.M. wrote the paper.

## 28 **Abstract**

29 Sex chromosomes form once recombination is halted between the X and Y  
30 chromosomes. This loss of recombination quickly depletes Y chromosomes of  
31 functional content and genetic variation, which is thought to severely limit their potential  
32 to generate adaptive diversity. We examined Y diversity in *Poecilia parae*, where males  
33 occur as one of five discrete morphs, all of which shoal together in natural populations  
34 where morph frequency has been stable for over 50 years. Each morph utilizes different  
35 complex reproductive strategies, and differ dramatically from each other in color, body  
36 size, and mating behavior. Remarkably, morph phenotype is passed perfectly from  
37 father to son, indicating there are five Y haplotypes segregating in the species, each of  
38 which encodes the complex male morph characteristics. Using linked-read sequencing  
39 on multiple *P. parae* females and males of all five morphs from natural populations, we  
40 found that the genetic architecture of the male morphs evolved on the Y chromosome  
41 long after recombination suppression had occurred with the X. Comparing Y  
42 chromosomes between each of the morphs revealed that although the Ys of the three  
43 minor morphs that differ predominantly in color are highly similar, there are substantial  
44 amounts of unique genetic material and divergence between the Ys of the three major  
45 morphs that differ in reproductive strategy, body size and mating behavior. Taken  
46 together, our results reveal the extraordinary ability of evolution to overcome the  
47 constraints of recombination loss to generate extreme diversity resulting in five discrete  
48 Y chromosomes that control complex reproductive strategies.

## 49 **Significance Statement**

50 The loss of recombination on the Y chromosome is thought to limit the adaptive  
51 potential of this unique genomic region. Despite this, we describe an extraordinary case  
52 of Y chromosome adaptation in *Poecilia parae*. This species contains five co-occurring  
53 male morphs, all of which are Y-linked, and which differ in reproductive strategy, body  
54 size, coloration, and mating behavior. The five Y-linked male morphs of *P. parae*  
55 evolved after recombination was halted on the Y, resulting in five unique Y  
56 chromosomes within one species. Our results reveal the surprising magnitude to which  
57 non-recombining regions can generate adaptive diversity and have important

58 implications for the evolution of sex chromosomes and the genetic control of sex-linked  
59 diversity.

## 60 **Introduction**

61 Sex chromosomes form when recombination is halted between the X and Y  
62 chromosomes. The loss of recombination results in a host of evolutionary processes  
63 that quickly deplete Y chromosomes of functional content and genetic variation,  
64 severely limiting the scope for adaptive evolution<sup>1</sup>. Y chromosomes can counter this  
65 loss to some degree through a variety of mechanisms<sup>2-5</sup>, however the adaptive potential  
66 of Y chromosomes is generally thought to be much lower than the remainder of the  
67 genome. Typically, this results in relatively low levels of Y chromosome diversity within  
68 species. The adaptive potential of non-recombining regions has far broader implications  
69 beyond just Y chromosomes given the increasing realization that supergenes, linked  
70 regions containing alleles at multiple loci underlying complex phenotypes, are key to  
71 many adaptive traits<sup>6-12</sup>. Many supergenes are lethal when homozygous and therefore  
72 also non-recombining<sup>8,10</sup>. Therefore, the processes that constrain Y chromosome  
73 evolution also affect much broader areas of the genome.

74 *Poecilia parae* is a small freshwater fish found in coastal streams of South America.  
75 Remarkably, males of this species are one of five distinct morphs that utilize different  
76 reproductive tactics, and differ in reproductive strategy, body size, color, and mating  
77 behaviour<sup>13-19</sup> (summarized in Table S1). There are three major morphs: parae,  
78 immaculata and melanzona. The parae morph has the largest body, vertical black  
79 stripes, an orange tail-stripe and is highly aggressive, chasing away rival males and  
80 aggressively copulating with females by force. Immaculata, resembles a juvenile  
81 female. Although immaculata has the smallest body size of all morphs, it has the largest  
82 relative testes and produces the most sperm, employing a sneaker copulation strategy.  
83 Melanzona is sub-divided into three minor morphs, which are similar in body size and all  
84 have a colored horizontal stripe (either red, yellow or blue), which they present to  
85 females during courtship displays.

86 All five morphs co-occur in the same populations, and the relative frequency of morphs  
87 is highly stable over repeated surveys spanning 50 years (~150 generations)<sup>13,14,20</sup>. This  
88 suggests that balancing selection, likely resulting from a combination of sexual and  
89 natural selection, is acting to maintain these five adapted morphs. Most importantly,

90 multigeneration pedigrees show that morph phenotype is always passed perfectly from  
91 father to son<sup>13</sup>, indicating morphs are Y-linked. Given their discrete nature and complex  
92 phenotypes, it is clear that the five *P. parae* morphs are controlled by five different Y  
93 chromosomes. This system therefore offers the potential for a unique insight into the  
94 adaptive potential of Y chromosomes, and the role of these regions of the genome in  
95 male phenotypes.

96 We have recently shown that poeciliid species closely related to *P. parae* share the  
97 same sex chromosome system as *Poecilia reticulata*<sup>21</sup> (guppies), however the extent of  
98 Y chromosome degeneration differs markedly across the clade. Although the Y  
99 chromosome in *P. reticulata* and *Poecilia wingei* contains only a small area of limited  
100 degeneration<sup>21-24</sup>, the entirety of the Y chromosome of *Poecilia picta* is highly  
101 degenerate<sup>21</sup>. *P. parae* is a sister species of *P. picta*, however *P. picta* males are  
102 markedly different from *P. parae* and do not resemble any of the five *P. parae*  
103 morphs<sup>18,20,25-27</sup>, suggesting extreme diversity was generated on the *P. parae* Y  
104 chromosome after recombination was halted with the X chromosome. Work on model  
105 systems has indeed shown Y chromosomes can accumulate new genetic material<sup>2-5</sup>,  
106 yet these differences occur over long periods of time and are only evident when  
107 comparing Ys across species. Non-model systems, such as *P. parae*, provide a unique  
108 opportunity to explore the limits and role of non-recombining regions in generating  
109 diversity.

110 Because *P. parae* is very difficult to breed in the lab we collected tissue from natural  
111 populations in South America where all five male morphs co-occur and used linked-read  
112 sequencing on multiple females and males of all five morphs. We first confirmed that *P.*  
113 *parae* shares the same sex chromosome system as its close relatives<sup>21,22</sup>. We went on  
114 to find patterns of X-Y divergence are the same for all five Y chromosomes and  
115 matches the X-Y divergence we observed in *P. picta*, suggesting that the morphs  
116 emerged after Y chromosome recombination was stopped in a common ancestor of *P.*  
117 *parae* and *P. picta*. Comparing the five Y chromosomes to each other, we find that while  
118 the Ys of the three minor morphs (red, yellow and blue melanzona) that differ only in  
119 color are highly similar, the Ys of the three major morphs (*parae*, *immaculata*, and  
120 *melanzona*) that differ in reproductive strategy, body size and mating behavior are

121 significantly diverged from one another and carry substantial amounts of unique genetic  
122 material. Taken together, our results reveal the surprising ability of the Y chromosome  
123 to not only overcome the constraints of recombination loss, but to generate extreme  
124 diversity, resulting in five discrete Y chromosomes that control complex reproductive  
125 strategies.

126

## 127 **Results**

128 We collected 40 individual *P. parae* from natural populations in Guyana in December  
129 2016, including eight red melanzona, four blue melanzona, five yellow melanzona, five  
130 immaculata, seven *parae* morph males, and 11 females. 29 samples with sufficiently  
131 high molecular weight were individually sequenced with 10X Genomics linked-reads.  
132 We generated a *de novo* genome assembly for each of these samples. The remaining  
133 11 lower molecular weight samples were individually sequenced with Illumina  
134 sequencing paired end reads (see Tables S2 and S3 for sequencing and assembly  
135 details).

136

### 137 ***The P. parae Y chromosome is highly diverged from the X and shared with P.*** 138 ***picta***

139 Degeneration of the Y chromosome results in reduced male coverage when mapped to  
140 a female reference genome. The ratio of male to female mapped reads can be used to  
141 identify regions where the Y and X chromosomes differ substantially from each  
142 other<sup>21,28-30</sup>. To do this, we used our best female *de novo P. parae* genome, based on  
143 N50 and other assembly statistics (see Table S3). We then determined chromosomal  
144 position of the scaffolds using the reference-assisted chromosome assembly (RACA)  
145 pipeline, which combines phylogenetic and sequencing data to place scaffolds along  
146 chromosomes<sup>31</sup>. Next we mapped reads from all 40 samples to this female assembly  
147 and calculated male:female coverage, first for each of the five morphs independently,  
148 and then all morphs together.

149 As we previously found in *P. picta*<sup>21</sup>, chromosome 8 (syntenic to *P. reticulata*  
150 chromosome 12) showed a clear signal of reduced read coverage in males (Figure 1a-  
151 b), indicating an XY sex determination system. Y divergence is evident across nearly  
152 the entire chromosome and is largely identical to the pattern we previously observed in  
153 *P. picta* (Figure 1c and Fig. S1). This suggests that these species inherited a highly  
154 degenerate Y chromosome from their common ancestor, well before the origin of the *P.*  
155 *parae* male morphs.

156 Short sequences representing all the possible substrings of length  $k$  that are contained  
157 in a genome are referred to as  $k$ -mers, and  $k$ -mer comparisons between male and  
158 female genomes has been used to identify Y chromosome sequence (Y-mers) in a wide  
159 range of organisms<sup>32-34</sup>, including guppies<sup>35</sup> and *P. picta*<sup>21</sup>. We first compared all males,  
160 representing all five morphs, to all females. We found a total of 27,950,090 Y-mers (of  
161 31bp) that were present in at least two males but absent from all females. However,  
162 only 59 of these Y-mers were present in all 23 males (Figure 2). We found only 251,472  
163  $k$ -mers present in at least two females but absent from all males, and 0 of these were  
164 found in all 6 females, demonstrating our Y-mer approach had a very low false positive  
165 rate.

166 We next used Y-mer analysis to further test whether recombination was halted on the Y  
167 in the common ancestor of *P. parae* and *P. picta*. Of the 646,745 Y-mers that we  
168 previously identified in at least one *P. picta* male and no females<sup>21</sup>, 790 *P. picta* Y-mers  
169 matched Y-mers we identified in *P. parae*, consistent with a shared history of  
170 suppressed recombination. Additionally, these shared Y-mers were present in males of  
171 all morphs (Fig. S2) and discussed in more detail below. These shared Y-mers,  
172 combined with the striking similarity in male:female read mapping (Fig. S1) provide  
173 compelling evidence that the vast majority of Y chromosome recombination suppression  
174 occurred in a common ancestor of *P. picta* and *P. parae*.

175

### 176 ***The P. parae* Y chromosomes are highly diverged from each other**

177 We next compared Y-mers across individuals, generating a phylogeny on the  
178 presence/absence of Y-mers in all the *P. parae* individuals with *P. picta* as an outgroup

179 (Figure 2). Clear clades were recovered for each of the major morphs (immaculata,  
180 parae and melanzona) while the three minor morphs of melanzona (red, yellow, blue)  
181 were very similar to one another.

182 The phylogenetic relationships of individuals (Figure 2) closely match the relative Y-mer  
183 comparisons across morphs (Figure 3). We found 64,515 Y-mers in every immaculata  
184 male that were not in any parae or melanzona males (i.e. immaculata-mers), 87,629  
185 melanzona-mers, and 1,435 parae-mers, suggesting that the melanzona and  
186 immaculata Y chromosomes may contain more unique, non-repetitive sequence  
187 compared to the parae Y. Moreover, we found 10,673 Y-mers in all melanzona and  
188 parae males that did not occur in any immaculata males (Figure 2), suggesting that the  
189 parae Y shares greater sequence similarity to the melanzona Y.

190 We calculated our false positive rate by randomly permuting our male samples into  
191 groups regardless of morph and determining Y-mers present in all males of each group  
192 that were absent from all other males. We found no unique Y-mers in groups of five or  
193 more random males, and just 31 unique Y-mers in groups of four random males,  
194 demonstrating the false positive rate of our morph-mer approach is exceedingly low  
195 (Fig. S3).

196

### 197 ***Mapping morph-mers confirms high diversity of Y chromosomes***

198 The large number of morph-mers we identified could either indicate that the discrete  
199 morphs are the result of low divergence across large Y chromosomes, or smaller  
200 complexes of highly diverged Y sequence. To resolve this, we mapped the respective  
201 set of morph-mers to the 21 *de novo* male genomes. If divergence across the morph-  
202 specific Y chromosomes is low compared to each other, mapped morph-mers would be  
203 dispersed across many scaffolds. Instead we found morph-mers were not evenly  
204 dispersed. For example, a single melanzona scaffold (~110kb) containing 27% of all  
205 melanzona-mers (23,773), and most morph-mers overlapped one another (Fig. S4 and  
206 S5). This confirms our morph-mer approach identified complexes of highly diverged Y  
207 sequence.



208 To compare the relative size of these diverged complexes across morphs, we identified  
209 all scaffolds that contained >5 morph-mers in each individual. The average amount of  
210 sequence contained within these morph-mer scaffolds was 1.3 Mb for melanzona, 3.2  
211 Mb for immaculata, and just 0.1 Mb for parae individuals (Table S4). This complements  
212 the relative number of Y-mers we found for each morph and together suggests the  
213 amount of unique Y chromosome sequence differs across morphs, with the parae  
214 morph Y containing the smallest amount of unique genetic material.

215

### 216 ***Read mapping confirms high divergence of Y chromosomes***

217 To determine how divergent the five Y chromosomes are from one another, we mapped  
218 reads from all 39 samples to full *de novo* genome assemblies of each male morph (200  
219 total alignments). Most scaffolds contain autosomal sequence, and coverage is not  
220 expected to differ by sex or morph. Meanwhile, scaffolds containing morph specific  
221 sequence will have higher coverage by males of the same morph (e.g. immaculata  
222 reads mapped to an immaculata assembly) than coverage by males of a different morph  
223 (e.g. melanzona reads mapped to an immaculata assembly). Low female coverage of  
224 such scaffolds confirms these regions are on the Y and are substantially diverged from  
225 the X.

226

227 As expected, when comparing coverage between males of the same morph as the  
228 reference assembly and the other morphs we found average coverage was 1:1 when  
229 considering all scaffolds, yet scaffolds enriched for morph-mers (containing >5) had  
230 much higher coverage by males of the same morph as the reference (Figure 4).  
231 Surprisingly, we found no coverage by immaculata or parae reads for nearly half  
232 (40/100) of the scaffolds enriched for melanzona-mers. Similarly, 14 of the 93 scaffolds  
233 enriched for immaculata-mers had no coverage when we mapped melanzona and  
234 parae reads. Meanwhile, in agreement with our morph-mer analysis, all 12 of the  
235 scaffolds enriched for parae-mers had nearly equal coverage by melanzona and  
236 immaculata reads, once again suggesting that the parae Y contains very little unique Y  
237 sequence.

238 We also found the ratio of male:female coverage was much higher for morph-mer  
239 scaffolds, many of which had no female coverage, again confirming these complexes of  
240 morph specific sequence are located in non-recombining regions of the Y chromosome  
241 (Figure 4).

242

### 243 **Gene annotation of morph-mer scaffolds**

244 We identified genes on scaffolds with >5 morph-mers. In total, we found 7 genes on the  
245 scaffolds containing the 59 Y-mers present in all morphs (totaling 30,558,901 bp), 291  
246 genes on the immaculata scaffolds of sample P09 (totaling 9,748,162bp), 15 genes on  
247 the melanzona scaffolds of sample P01 (totaling 295,057 bp), and no genes on the  
248 parae morph scaffolds of P04 (totaling 127,542 bp) (Tables S5, S6 and S7).

249 Only one gene was predicted on scaffolds that were completely unique to melanzona  
250 (*trim35*), and only two genes were predicted on scaffolds completely unique to  
251 immaculata (*trim39* and *nirc3*). Members of the *Trim* gene family act throughout the  
252 body and are well known to rapidly evolve novel functions<sup>36,37</sup>. Meanwhile, *nirc3* has  
253 been shown to selectively block cellular proliferation and protein synthesis by inhibiting  
254 the mTOR signalling pathway<sup>38</sup>, which could play a role in keeping immaculata the  
255 smallest morph. Several copies of the transcription factor *Tbx3* were present on male  
256 unique scaffolds in both melanzona and immaculata morphs. *Tbx* genes play key roles  
257 in development and act as developmental switches<sup>39-41</sup>, raising the possibility that it  
258 could play a role in orchestrating the multi-tissue traits that differ across morphs.

259 We also found several copies of *texim* genes on male scaffolds of melanzona and  
260 immaculata that most closely match *texim2* and *texim3*. While the function of *texim2*  
261 and *texim3* are largely unknown they have been shown to be highly expressed in the  
262 brain and testis of closely related species<sup>42</sup>. In *Xiphophorus maculatus*, a close relative  
263 to *P. parae* (~45 mya<sup>43</sup>), the transposable element *helitron* has moved *texim1* to the sex  
264 determining region of the Y chromosome and duplicated it resulting in three copies of  
265 *texim* that are expressed specifically in late stage spermatogenesis<sup>42</sup>. The copies of  
266 *texim2* and *texim3* that we identified on the Y chromosome of *P. parae* are not the same

267 as those in *X. maculatus* as the Ys arose independently and the *X. maculatus* Y is not  
268 chromosome 8.

269 We also found a large number of transposable elements on scaffolds enriched for the Y-  
270 mers that were present in all individuals, and the scaffolds enriched for morph-mers,  
271 including 90 copies of the *helitron* transposable element on scaffolds enriched for  
272 melanzona-mers, and 38 copies on scaffolds enriched for immaculata-mers (Tables S9  
273 and S10). It is possible that a process similar to *X. maculatus* has occurred in *P. parae*  
274 where either TEs have moved *texim2* and *texim3* to Y specific sequence or Y specific  
275 sequence has evolved around these genes. Future analyses are needed to determine  
276 the roles of these and other genes in generating the morph-specific phenotypes.

277

## 278 **Discussion**

279 Recombination is widely regarded as one of the most important processes generating  
280 phenotypic diversity as it produces novel allelic combinations on which selection can  
281 act<sup>44</sup>. The loss of recombination is classically assumed to prevent the generation of  
282 novel large-scale phenotypes, as non-recombining regions are expected to rapidly lose  
283 diversity through sweeps and background selection<sup>1,45-53</sup> and have only limited potential  
284 for adaptive evolution. The power of these processes to deplete non-recombining  
285 regions of diversity is clearly evident in the Y chromosomes of many species<sup>1</sup>.

286 Our results, based on both similarity of Y degeneration (Fig. S1) and shared Y-mers,  
287 are consistent with recombination suppression between the X and Y chromosome in the  
288 common ancestor of *P. parae* and *P. picta* (14.8-18.5 mya<sup>43</sup>) and a highly degenerate Y  
289 present at the origin of *P. parae*. Importantly, none of the characteristics that  
290 differentiate the immaculata, parae or three melanzona morphs of *P. parae* are found in  
291 any close relatives, which means the genetic basis of the extreme diversity in morphs  
292 evolved on a non-recombining, highly degenerate Y chromosome. Given that these  
293 morphs differ in a suite of complex traits, including body size, testis size, color pattern,  
294 and mating strategy, it is highly likely that they are underpinned by polygenic genetic  
295 architectures, which evolved on the *P. parae* Y chromosome. Consistent with complex

296 differences between morphs, we identified substantial morph-specific genetic material  
297 (Figures 2-4) that was also absent in females and therefore Y-linked.

298 Although male-specific regions of the genome may experience elevated mutation  
299 rates<sup>54</sup>, it is far more likely that the high *P. parae* Y diversity was generated through  
300 translocations and/or transposable element (TE) movement. Translocations have been  
301 shown to increase Y-chromosome content<sup>2,55</sup>. In contrast, although TE movement has  
302 historically been considered to be a deleterious process, more recent reports have  
303 revealed that TEs can alter regions by removing or adding regulatory or coding  
304 sequence<sup>39,56-59</sup>, and TEs may even act as substrate for novel genes<sup>60</sup>. As predicted for  
305 non-recombining regions, we found a large number of TEs in the five *P. parae* Y  
306 chromosomes.

307

### 308 ***Making and Maintaining Five Morphs***

309 We found remarkable morph specific genetic diversity on the Y chromosome of *P.*  
310 *parae*. Intriguingly, that diversity is maintained within populations, as evidenced by the  
311 stability in morph frequencies over repeated surveys spanning 50 years, or roughly 150  
312 generations<sup>13,14,20</sup>. Even if alternative morphs have exactly equal fitness, populations  
313 are expected to eventually fix for one morph due to drift<sup>61</sup>. Maintaining alternative  
314 morphs within the same population relies on negative frequency dependent selection,  
315 thus as one morph decreases in frequency its fitness increases, such as with the three  
316 male morphs of the side blotched lizard<sup>62</sup>.

317 Previous work suggests that *P. parae* morphs are also under negative frequency  
318 dependent selection<sup>14-17</sup>, and this could facilitate the establishment and maintenance of  
319 five distinct Y chromosomes within the same species. Most new mutations are expected  
320 to be lost through drift if they do not confer a high enough fitness advantage over  
321 alternative alleles<sup>63</sup>, but mutations resulting in a new morph would be at the lowest  
322 frequencies and thus have the highest fitness, allowing them to rapidly stabilize in the  
323 population. Alternatively, it is possible that the morphs arose in separate populations  
324 and only later came into sympatry.

325

## 326 **Genetic Basis of Male Reproductive Morphs**

327 Autosomal non-recombining regions have been shown to be associated with alternative  
328 reproductive strategies in a range of species<sup>7,9,64-68</sup>. For example, male morphs of the  
329 white throated sparrow, which differ in pigmentation and social behavior, are the result  
330 of a hybridization event which instantly brought together alternative sequence and  
331 halted recombination<sup>65</sup>. Importantly, because none of the characteristics of the *P. parae*  
332 morphs are found in any close relatives, it is unlikely that hybridization is the source of  
333 the Y chromosomes we describe.

334 The alternative male morphs in the ruff are controlled by an autosomal supergene that  
335 is composed of two alternative versions of an inverted region<sup>10</sup>. It has yet to be  
336 determined whether the diversity across these ruff supergenes pre-dates the inversion  
337 or arose after recombination stopped as it did in *P. parae*.

338 A large inverted region is also associated with social morphs in many ant species, this  
339 region formed in a common ancestor and has been maintained by balancing selection  
340 through repeated speciation events<sup>12</sup>. Although it is possible that the multiple male  
341 morphs in *P. parae* arose in an ancestor, this is less likely as they have not been  
342 observed in any related species to date.

343

## 344 **Conclusion**

345 The role of recombination in shaping co-adapted allele complexes has long been an  
346 enigma, given that recombination is both a key mechanism in generating diverse allelic  
347 combinations, yet recombination also acts to break up such combinations. Here we  
348 found that tremendous diversity can still be generated without the power of  
349 recombination, and the Y chromosome contains remarkable adaptive potential with  
350 regard to male phenotypic evolution. The five Y-linked male morphs of *P. parae*  
351 emerged and diverged after recombination was halted, resulting in five unique Y  
352 chromosomes within one species. Future work identifying the mechanisms by which  
353 morphs are determined by these five Y chromosomes will provide much needed insight

354 to determining which evolutionary forces have led to and shaped these amazing  
355 complexes and their co-evolution with the rest of the genome, which is shared across all  
356 morphs.

357

## 358 **Methods**

359

### 360 ***Field Collections and DNA Isolation***

361 To ensure we accounted for natural diversity in the five Y chromosomes of *P. parae*,  
362 and because this species is extremely difficult to breed in captivity, we collected all  
363 samples (N=40) from large native populations around Georgetown, Guyana in 2016  
364 (see Table S2 and Sandkam, et al. <sup>18</sup> for description of populations) (Environmental  
365 Protection Agency of Guyana Permit 120616 SP: 015). Individuals were rapidly  
366 sacrificed in MS-222, whole-tail tissue was dissected into EtOH and immediately placed  
367 in liquid nitrogen to maintain integrity of high molecular weight (HMW) DNA. Tissue  
368 samples were brought back to the lab and kept at -80° C until HMW DNA extraction.

369 HMW DNA was extracted from 25mg tail tissue of each sample following a modified  
370 protocol from 10X Genomics described in Almeida *et al*<sup>24</sup>. Briefly, nuclei were isolated  
371 by gently homogenizing tissue with a pestle in cold Nuclei Isolation Buffer from a Nuclei  
372 PURE Prep Kit (Sigma). Nuclei were pelleted and supernatant removed before being  
373 digested by incubating in 70 µl PBS, 10 µl Proteinase K (Qiagen), and 70 µl Digestion  
374 buffer (20mM EDTA, 2mM Tris-HCL, 10mM N-Laurylsarcosine) for two hours at room  
375 temperature on a tube rotator. Tween 20 was added (0.1% final concentration) and  
376 DNA was bound to SPRIselect magnetic beads (Beckman Coulter) for 20 min. Beads  
377 were bound to a magnetic rack and washed twice with 70% Ethanol before eluting DNA.  
378 Samples were visually screened for integrity of HMW DNA on an agarose gel. Of the 40  
379 samples extracted, 29 passed initial screening and were used for individual 10X  
380 Chromium linked-read sequencing (six female, seven red, five yellow, one blue, four  
381 immaculata, and six parae morph). The remaining 11 samples (five female, one red,  
382 three blue, one immaculata, and one parae morph) were individually sequenced on an

383 Illumina HiSeqX as 2 x 150 bp reads using the v2.5 sequencing chemistry with 300bp  
384 inserts and trimmed with trimmomatic (v0.36)<sup>69</sup>. To ensure high coverage of the Y, all 40  
385 samples were individually sequenced to a predicted coverage of 40X (see Table S2 for  
386 number of reads after filtering), which would result in predicted 20X coverage of the  
387 haploid Y.

388

### 389 **10X Chromium Linked-read Sequencing and Assembly**

390 10X Chromium linked-read sequencing was performed at the SciLifeLab, Uppsala  
391 Sweden. The 10X Chromium pipeline adds unique tags to each piece of HMW DNA  
392 before sequencing on an Illumina platform. These tagged reads were either used  
393 directly in the 10X assembly pipeline, or tags were removed using the *basic* function of  
394 Longranger v.2.2.2 (10X Genomics), trimmed with trimmomatic (v0.36)<sup>69</sup> and treated as  
395 normal Illumina reads<sup>70</sup> for coverage analyses (Table S2).

396 Scaffold level *de novo* genomes were assembled for each of the 29 linked-read  
397 samples using the Supernova v2.1.1 software package (10X Genomics) (see Table S3  
398 for assembly statistics).

399 A female chromosome level assembly was created by assigning scaffolds to  
400 chromosomal positions. The female with the best *de novo* assembly (largest assembly  
401 size and scaffold N50) was used for the Reference Assisted Chromosome Assembly  
402 (RACA) pipeline<sup>31</sup>. Briefly, scaffolds were aligned with LASTZ v1.04<sup>71</sup> against high-  
403 quality chromosome level genome assemblies of a close relative (*Xiphophorus helleri*  
404 v4.0; GenBank accession GCA\_003331165) and an outgroup (*Oryzias latipes* v1;  
405 GenBank accession GCA\_002234675). Alignments were then run through the UCSC  
406 chains and nets pipeline from the kentUtils software suite<sup>72</sup> before passing to the RACA  
407 pipeline. RACA uses alignments of short-insert and long-insert paired reads that bridge  
408 scaffolds to further order and confirm scaffold arrangement. For short-insert data, 150bp  
409 reads from the five females sequenced with paired-end Illumina (300bp inserts) were  
410 aligned to the target assembly with Bowtie2 v2.2.9<sup>73</sup> reporting concordant mappings  
411 only (--no-discordant option). For long-insert data, synthetic 150bp 'pseudo-mate-pair'  
412 reads were generated from the *de novo* scaffolds of the 6 female *P. parae* samples

413 sequenced with Chromium linked-reads. To increase the likelihood that bridge reads  
414 spanned scaffolds, we generated two long-insert pseudo-mate-pair libraries for each of  
415 the six *de novo* female genomes, a 2.3kb insert library and a 15kb insert library, and  
416 aligned these to the target assembly. RACA then used the information from both the  
417 phylogenetically weighted genome pairwise alignments, and the read mapping data to  
418 order the target scaffolds into longer predicted chromosome fragments.

419 To identify which chromosome is the sex chromosome and determine the extent of X-Y  
420 divergence, we mapped reads from all 40 individuals to the female scaffolds that had  
421 RACA generated chromosome annotations using the *aln* function of *bwa* (v0.6.1)<sup>74</sup>.  
422 Alignments were filtered for uniquely mapped reads and average scaffold coverage was  
423 calculated using soap.coverage v2.7.7 (<http://soap.genomics.org.cn/>). To account for  
424 differences across individuals in sequencing library size, we divided the coverage of  
425 each scaffold by the average coverage across all scaffolds for each individual. Male to  
426 female (M:F) fold change in coverage of each scaffold was calculated for all males, and  
427 each of the five morphs as  $\log_2(\text{average male coverage}) - \log_2(\text{average female}$   
428  $\text{coverage})$ <sup>75</sup>. Upon observing chromosome 8 was the sex chromosome, we calculated  
429 the 95% CI for M:F coverage by bootstrapping across all scaffolds which RACA placed  
430 on the autosomes.

431

### 432 ***Identifying Morph specific sequence by k-mers***

433 To locate morph specific sequence, we identified morph specific *k*-mers (morph-mers)  
434 and then mapped these to the respective *de novo* genome assemblies. First Jellyfish  
435 v2.2.3<sup>74</sup> was used to identify all 31bp *k*-mers from the ‘megabubble’ output of each of  
436 the 22 male *de novo* genome assemblies from supernova. The ‘megabubble’ outputs  
437 from supernova include all sequence before being flattened into final phased scaffolds,  
438 this minimizes any potential *k*-mer loss due to arbitrary flattening (a benefit over *k*-mers  
439 from the full pseudohap output of supernova) and excludes *k*-mers from sequencing  
440 errors (a benefit over *k*-mers from sequencing reads). We next identified the putative Y-  
441 linked *k*-mers in each sample by removing all *k*-mers present in any of the females. For  
442 female *k*-mer identification we conservatively took *k*-mers from both the megabubble



443 outputs and the raw Illumina reads of all 11 female individuals, which we used to identify  
444 every 31bp *k*-mer present >3 times (this maximized the chance of including *k*-mers from  
445 unassembled regions of female genomes but minimized *k*-mers from sequencing  
446 errors<sup>35</sup>). The *k*-mers present in females all occur either on autosomes or the X  
447 chromosome, therefore by removing the female *k*-mers from all *k*-mers identified in  
448 males we are left with putative Y-linked *k*-mers that we call Y-mers<sup>21,35</sup>. To exclude *k*-  
449 mers representing autosomal SNPs unique to a single male we required Y-mers be  
450 present in at least two individuals. Since all female sequence is theoretically present in  
451 males, we validated our method by identifying all *k*-mers from the six female  
452 megabubbles that were not present in the male Illumina reads and found how many  
453 were present in at least two female individuals.

454 We then combined all the Y-mers we found with those we previously identified in *P.*  
455 *picta*<sup>21</sup> and used the presence of Y-mers as character states to build a phylogeny of all  
456 individuals and *P. picta*. Two runs of MrBayes v3.2.2<sup>76</sup> were run for 100,000 generations  
457 with Y-mers treated akin to restriction sites (model F81 with rates set to equal). The SD  
458 of the split frequencies between runs reached 0 indicating both runs converged on  
459 identical and robust trees.

460 Monophyletic clades were recovered for each of the major morphs (*immaculata*, *parae*  
461 *and melanzona*). We then identified unique Y-mers in each clade (Y-mers present in  
462 every individual of that clade but not present outside that clade). This approach  
463 provided us with all morph-mers (Y-mers present in every individual of a given morph  
464 but not present in any individual of the other morphs).

465 These morph-mers reveal two insights: (1) at a gross level they provide a sense of how  
466 much Y sequence is shared within versus across morphs and (2) mapping these morph-  
467 mers to the respective *de novo* genomes allows us to identify regions of morph specific  
468 sequence<sup>34,35,77,78</sup>. To find these regions of morph specific sequence we first mapped  
469 the corresponding set of 31bp morph-mers to each of the 22 *de novo* male genomes  
470 (pseudohap style of Supernova output) using bowtie2<sup>73</sup> allowing for no mismatches,  
471 gaps, or trimming. We found morph-mers disproportionately map to scaffolds, indicating

472 they came from regions of highly diverged morph-specific sequence rather than evenly  
473 dispersed lowly diverged sequence (Fig. S3 and S4).

474 To verify our pipeline was identifying true Y-specific alignments we attempted to align  
475 the Y-mers and all of the morph-mers to each of the six female *de novo* genome  
476 assemblies and found no alignments could be made. We next verified that our morph-  
477 mers were targeting morph specific sequence by attempting to align each of the morph-  
478 mer datasets to individuals of the opposite morphs and again found no alignments could  
479 be made.

480

### 481 **Coverage analysis**

482 To independently verify that the scaffolds identified by our *k*-mer approach contained  
483 highly diverged sequence, we aligned each of the 39 individuals to the individual with  
484 the best *de novo* genome of each morph (based on assembly size, scaffold N50, and  
485 contig N50, Supplementary Table 3). Alignments were generated with the *mem* function  
486 of *bwa* (v0.7.17)<sup>74</sup>. *samtools* (v1.10) was used to remove unmapped reads and  
487 secondary alignments with the *fixmate* function, and duplicates were removed with  
488 *markdup*. *bamqc* was then used to assess distribution of map quality. For each  
489 individual, the average coverage of each scaffold by reads with mapq >60 was  
490 determined using the *depth* function of *samtools* (v1.10). Y chromosomes are notorious  
491 for high incidents of transposable elements and repeats, this highly conservative filtering  
492 decreased false alignments to these regions. To account for differences across  
493 individuals in sequencing library size, we took the coverage of each scaffold divided by  
494 that individual's coverage across all scaffolds. The average raw scaffold coverage  
495 across all individuals was 29.97X, therefore any scaffold with a corrected coverage <  
496 0.025 (raw coverage <1X) was considered to have a coverage of 0.

497

### 498 **Gene Annotation**

499 To identify genes on morph specific scaffolds we followed the pipeline described in  
500 Almeida *et al*<sup>24</sup>. Briefly, we took a very conservative approach by annotating only the

501 scaffolds with >5 morph-mers from each of the *de novo* references used for the  
502 coverage analysis (one of each morph). The chance of a scaffold containing any  
503 particular 31bp *k*-mer depends on the length of the scaffold and can be calculated  
504 roughly as  $0.25^{31} \times$  scaffold length. The longest male scaffold we recovered was  
505 19,887,348 and therefore had the greatest chance of containing any given Y-mer;  
506  $4.31 \times 10^{-12}$ . The most abundant morph-mers were melanzona-mers (87,629), therefore  
507 the likelihood of the largest scaffold containing one melanzona-mer by chance was  
508  $4.31 \times 10^{-12} \times 87,629 = 3.78 \times 10^{-7}$  and the likelihood it contains 5 melanzona-mers purely  
509 by chance was roughly  $7.71 \times 10^{-33}$ . If we conservatively assume that all scaffolds have  
510 the same probability of containing a Y-mer by chance and the male with the most  
511 scaffolds had 25,416 scaffolds – there was a likelihood of  $1.96 \times 10^{-28}$  that a scaffold was  
512 incorrectly identified.

513 We then annotated these scaffolds with MAKER v2.31.10<sup>79</sup>. We ran the MAKER  
514 pipeline twice: first based on a guppy-specific repeat library, protein sequence, EST and  
515 RNA sequence data (later used to train *ab-initio* software) and a second time combining  
516 evidence data from the first run and *ab-initio* predictions. We create a repeat library for  
517 these scaffolds using *de novo* repeats identified by RepeatModeler v1.0.10<sup>80</sup> which we  
518 then combined with Actinopterygii-specific repeats to use with RepeatMasker v4.0.7<sup>81</sup>.  
519 Annotated protein sequences were downloaded from Ensembl (release 95)<sup>82</sup> for 8 fish  
520 species: *Danio rerio* (GRCz11), *Gasterosteus aculeatus* (BROADS1), *Oryzias latipes*  
521 (ASM223467v1), *Poecilia latipinna* (1.0), *Poecilia mexicana* (1.0), *Poecilia reticulata*  
522 (1.0), *Takifugu rubripes* (FUGU5) and *Xiphophorus maculatus* (5.0). For ESTs, we used  
523 10,664 tags isolated from guppy embryos and male testis<sup>83</sup>. Furthermore, to support  
524 gene predictions we also used two publicly available libraries of RNA-seq data collected  
525 from guppy male testis and male embryos<sup>84</sup> and assembled with StringTie 1.3.3b<sup>85</sup>. As  
526 basis for the construction of gene models, we combined *ab-initio* predictions from  
527 Augustus v3.2.3<sup>86</sup>, trained via BUSCO v3.0.2<sup>87</sup>, and SNAP v2006-07-28<sup>88</sup>. To train  
528 Augustus and SNAP, we ran the MAKER pipeline a first time to create a profile using  
529 the protein and EST evidence along with RNA-seq data. Both Augustus and SNAP were  
530 then trained from this initial evidence-based annotation. Functional inference for genes  
531 and transcripts was performed using the translated CDS features of each coding

532 transcript. Gene names and protein functions were retrieved using BLASTp to search  
533 the Uniprot/Swissprot, InterProScan v5 and GenBank databases.

534

### 535 **Data Availability**

536 All reads will be submitted to GenBank.

537

### 538 **Acknowledgements**

539 We thank the members of the Mank lab and Dr. Nora Prior for stimulating conversations  
540 and excellent feedback on early drafts of the manuscript. This was supported by the  
541 Natural Sciences and Engineering Research Council of Canada through a Banting  
542 Postdoctoral Fellowship (to B.A.S.), the European Research Council (Grants 260233  
543 and 680951 to J.E.M.), and a Canada 150 Research Chair (to J.E.M.). Field work was  
544 conducted under Permit 120616 SP: 015 from the Environmental Protection Agency of  
545 Guyana. Sequencing was performed by the SNP&SEQ Technology Platform in  
546 Uppsala, Sweden. The CEIBA Biological Center partially subsidized our expenses  
547 during field collection in Guyana. We thank Clara Lacy for the illustrations of *P. parae*.

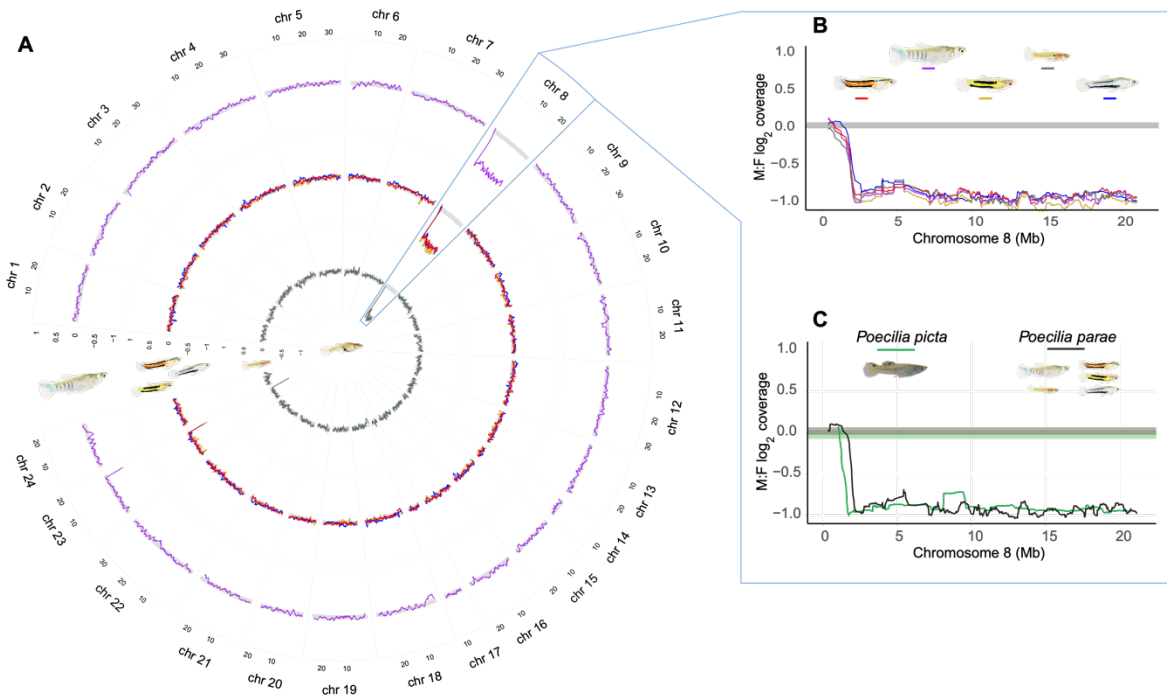

548  
549 **Figure 1.** Coverage differences between the sexes (male:female log<sub>2</sub>) for female  
550 scaffolds placed by RACA on the reference *Xiphophorus hellerii* chromosomes. (A)  
551 Average immaculata (inner ring), the three melanzona (middle ring) and parae morphs  
552 (outer ring) plotted across all chromosomes. Highlighted in blue is *X. hellerii*  
553 chromosome 8 which is syntenic to the guppy sex chromosome (*P. reticulata*  
554 chromosome 12). The decreased male coverage of chromosome 8 indicates this is also  
555 the sex chromosome in *P. parae*. (B) All five *P. parae* morphs share the same pattern of  
556 XY divergence, indicating a shared history of recombination suppression. (C) Pattern of  
557 *P. parae* XY divergence is the same as the sister species *P. picta*, indicating  
558 recombination was stopped in the common ancestor of *P. parae* and *P. picta* (14.8-18.5  
559 mya<sup>43</sup>). In each, horizontal grey-shaded areas represent the 95% confidence intervals  
560 based on bootstrap estimates across the autosomes.

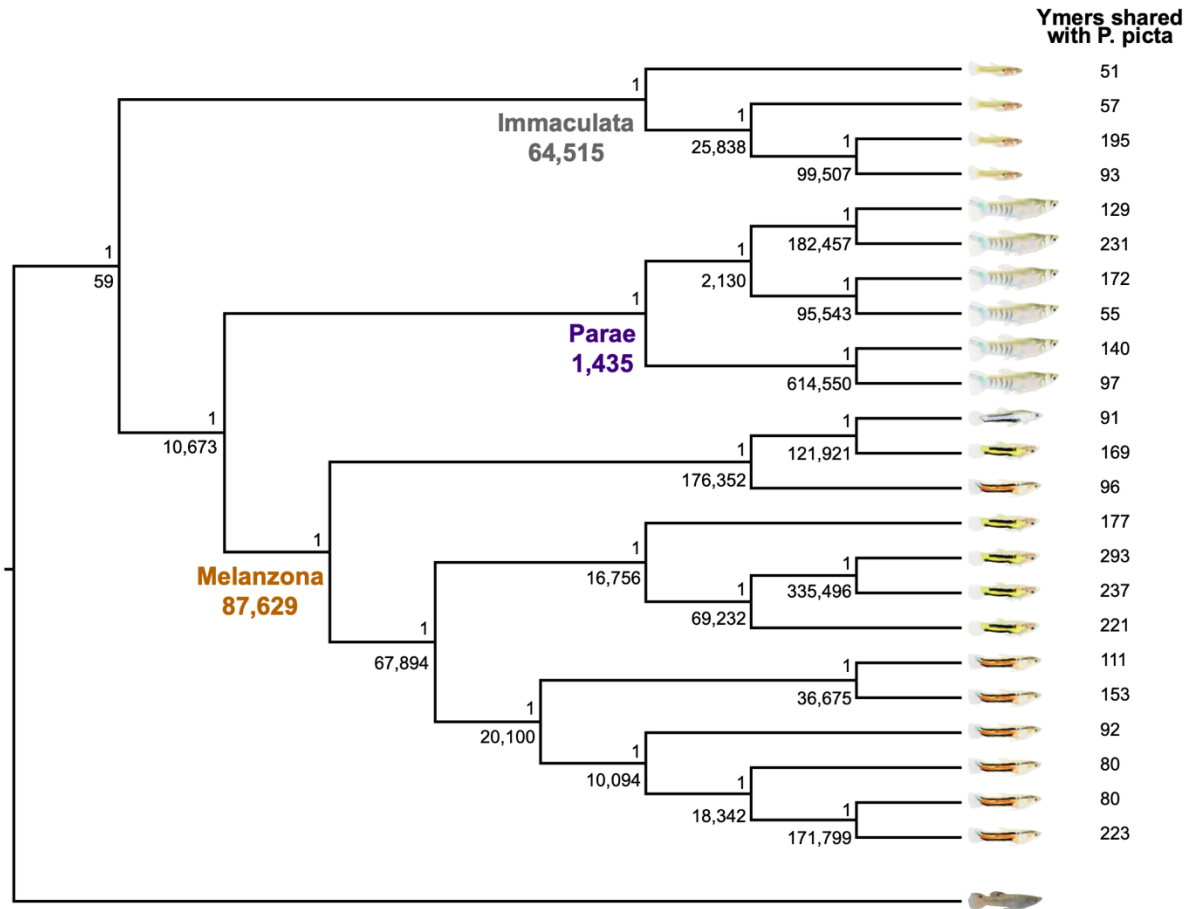

561  
 562 **Figure 2.** Bayesian Y chromosome phylogeny based on presence/absence of the  
 563 27,950,090 *P. parae* Y-mers and 1,646 *P. picta* Y-mers<sup>21</sup> in each individual and rooted  
 564 on *P. picta*. The posterior probability is presented above each node, below the node is  
 565 the number of *P. parae* Y-mers unique to all members of that clade. The three major  
 566 morphs of *P. parae* (immaculata, parae and melanzona) formed distinct clades and the  
 567 Y-mers unique to all members of these clades are called morph-mers.

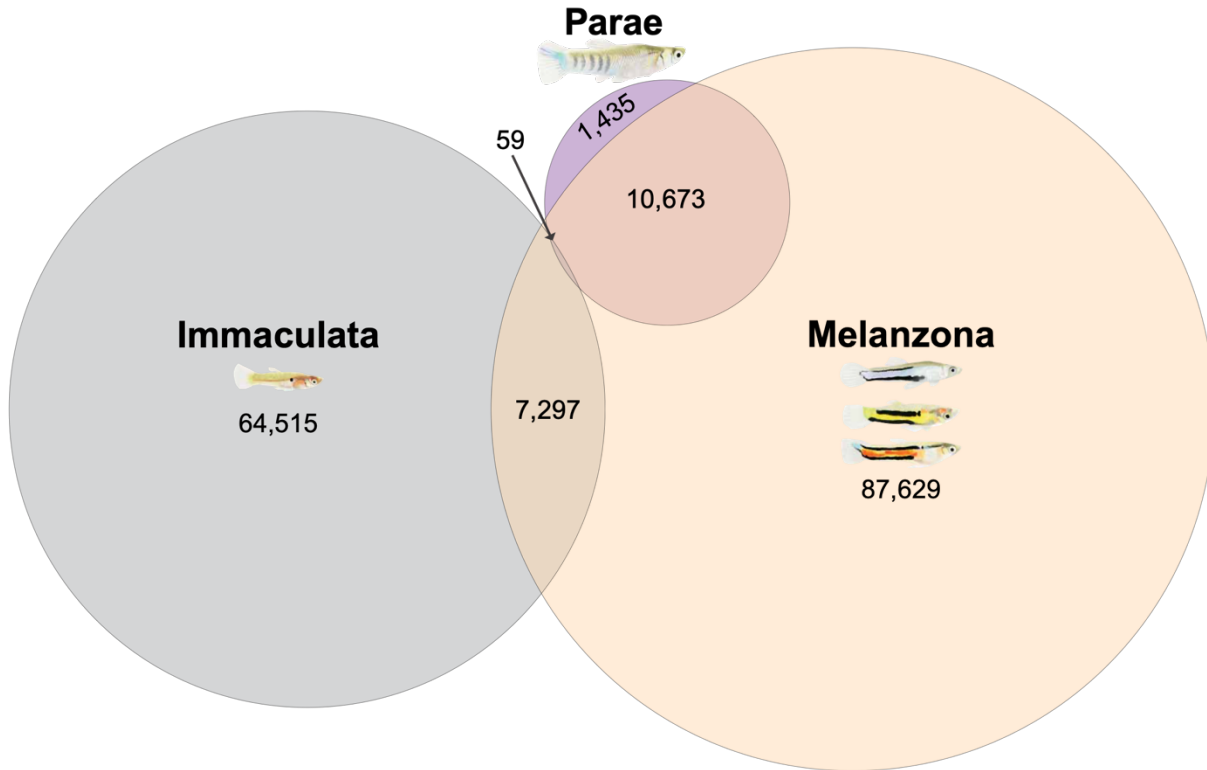

568

569 **Figure 3.** The distribution of the 27,950,090 *P. parae* Y-mers reveals strong differences  
570 across morphs. While there are very few Y-mers present in all morphs, each morph  
571 harbors unique Y-mers. The melanzona and parae morphs share more Y-mers with one  
572 another than either share with immaculata.

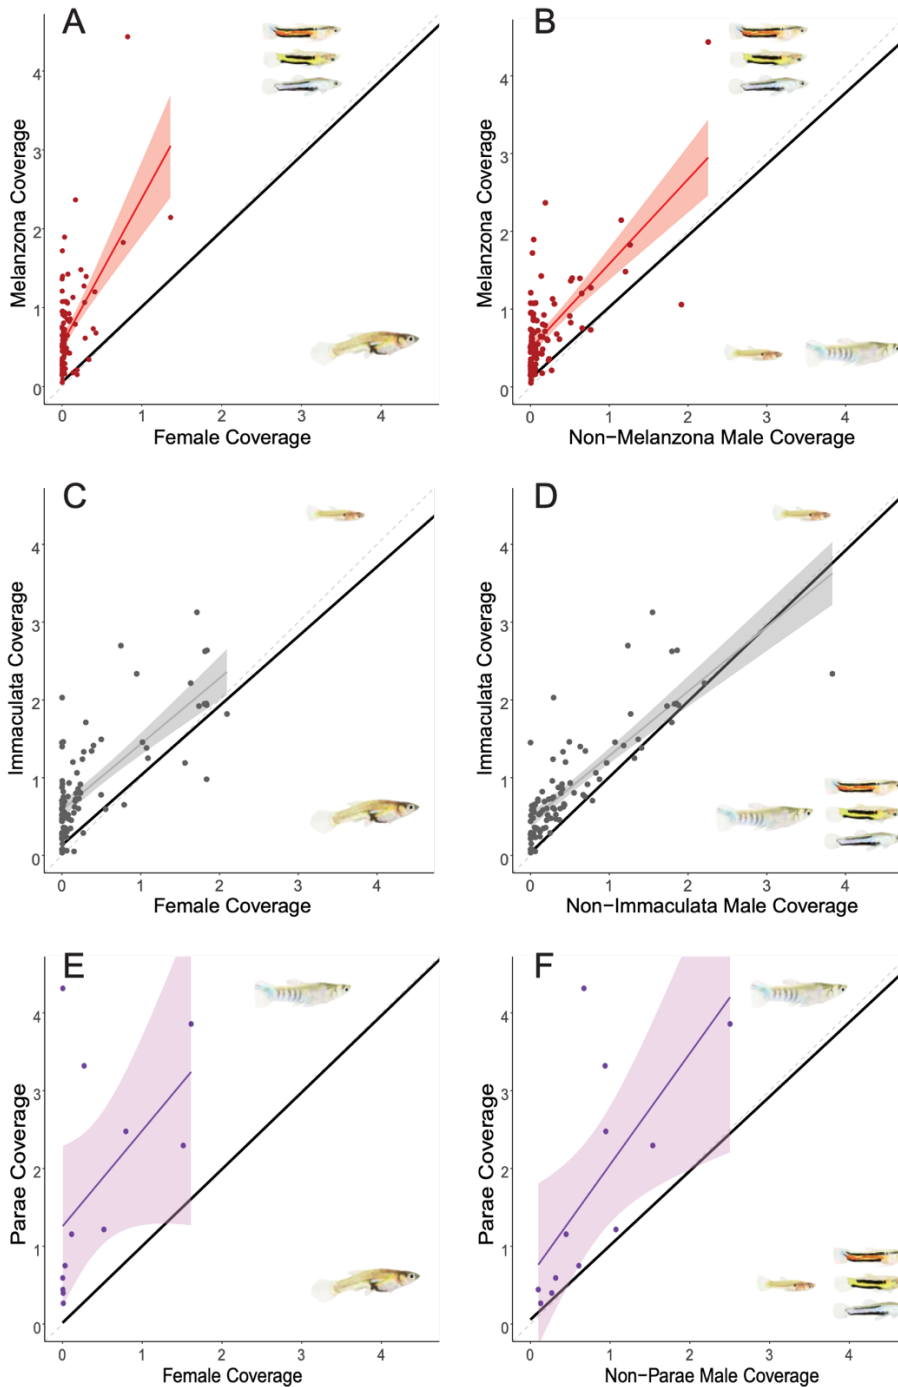

573

574 **Figure 4.** Relative corrected scaffold coverage of 39 individuals when aligned to  
575 melanzona (A-B), immaculata (C-D), and parae (E-F) *de novo* genomes. Scaffolds  
576 containing morph-mers had higher coverage by males than females (A,C,E) confirming  
577 these scaffolds contain male specific sequence. Scaffolds containing morph-mers also



578 had higher coverage by males of the reference morph than males of the other morphs  
579 (B,D,F), indicating the Y chromosome sequence is substantially diverged across  
580 morphs. In each, corrected scaffold coverage of focal morph is on the Y axis and  
581 corrected scaffold coverage of the compared morph is on the X axis. The 1:1 line is  
582 denoted as a grey dashed line. The linear regression and standard error across all  
583 scaffolds are shown as a thick black line that is nearly 1:1 for all morphs (note – 95%  
584 confidence interval is presented but too small to distinguish from the regression line).  
585 The scaffolds containing morph-mers are shown as colored points, the linear regression  
586 and standard error of morph-mer scaffolds are shown as a colored line and shaded  
587 region respectively.

## 588 References

589

- 590 1 Bachtrog, D. Y-chromosome evolution: emerging insights into processes of Y-  
591 chromosome degeneration. *Nat. Rev. Genet.* **14**, 113-124, doi:10.1038/nrg3366  
592 (2013).
- 593 2 Tobler, R., Nolte, V. & Schlotterer, C. High rate of translocation-based gene birth  
594 on the Drosophila Y chromosome. *P Natl Acad Sci USA* **114**, 11721-11726,  
595 doi:10.1073/pnas.1706502114 (2017).
- 596 3 Mahajan, S. & Bachtrog, D. Convergent evolution of Y chromosome gene  
597 content in flies. *Nat Commun* **8**, 785, doi:10.1038/s41467-017-00653-x (2017).
- 598 4 Bachtrog, D., Mahajan, S. & Bracewell, R. Massive gene amplification on a  
599 recently formed Drosophila Y chromosome. *Nat Ecol Evol* **3**, 1587-1597,  
600 doi:10.1038/s41559-019-1009-9 (2019).
- 601 5 Hall, A. B. *et al.* Radical remodeling of the Y chromosome in a recent radiation of  
602 malaria mosquitoes. *P Natl Acad Sci USA* **113**, E2114-2123,  
603 doi:10.1073/pnas.1525164113 (2016).
- 604 6 Todesco, M. *et al.* Massive haplotypes underlie ecotypic differentiation in  
605 sunflowers. *Nature*, doi:10.1038/s41586-020-2467-6 (2020).
- 606 7 Schwander, T., Libbrecht, R. & Keller, L. Supergenes and Complex Phenotypes.  
607 *Curr. Biol.* **24**, R288-R294, doi:10.1016/j.cub.2014.01.056 (2014).
- 608 8 Wang, J. *et al.* A Y-like social chromosome causes alternative colony  
609 organization in fire ants. *Nature* **493**, 664-668, doi:10.1038/nature11832 (2013).
- 610 9 Lamichhaney, S. *et al.* Structural genomic changes underlie alternative  
611 reproductive strategies in the ruff (*Philomachus pugnax*). *Nat. Genet.* **48**, 84-88,  
612 doi:10.1038/ng.3430 (2016).
- 613 10 Kupper, C. *et al.* A supergene determines highly divergent male reproductive  
614 morphs in the ruff. *Nat. Genet.* **48**, 79-83, doi:10.1038/ng.3443 (2016).
- 615 11 Branco, S. *et al.* Multiple convergent supergene evolution events in mating-type  
616 chromosomes. *Nature Communications* **9**, 2000, doi:10.1038/s41467-018-04380-  
617 9 (2018).
- 618 12 Yan, Z. *et al.* Evolution of a supergene that regulates a trans-species social  
619 polymorphism. *Nat Ecol Evol* **4**, 240-249, doi:10.1038/s41559-019-1081-1  
620 (2020).
- 621 13 Lindholm, A. K., Brooks, R. & Breden, F. Extreme polymorphism in a Y-linked  
622 sexually selected trait. *Heredity (Edinb)* **92**, 156-162, doi:10.1038/sj.hdy.6800386  
623 (2004).
- 624 14 Hurtado-Gonzales, J. L. & Uy, J. A. Alternative mating strategies may favour the  
625 persistence of a genetically based colour polymorphism in a pentamorphic fish.  
626 *Anim. Behav.* **77**, 1187-1194, doi:10.1016/j.anbehav.20 (2009).
- 627 15 Hurtado-Gonzales, J. L. & Uy, J. A. Intrasexual competition facilitates the  
628 evolution of alternative mating strategies in a colour polymorphic fish. *BMC Evol.*  
629 *Biol.* **10**, 391, doi:10.1186/1471-2148-10-391 (2010).
- 630 16 Hurtado-Gonzales, J. L., Baldassarre, D. T. & Uy, J. A. Interaction between  
631 female mating preferences and predation may explain the maintenance of rare

- 632 males in the pentamorphic fish *Poecilia parae*. *J. Evol. Biol.* **23**, 1293-1301,  
633 doi:10.1111/j.1420-9101.2010.01995.x (2010).
- 634 17 Hurtado-Gonzales, J. L., Loew, E. R. & Uy, J. A. Variation in the visual habitat  
635 may mediate the maintenance of color polymorphism in a poeciliid fish. *PLoS*  
636 *One* **9**, e101497, doi:10.1371/journal.pone.0101497 (2014).
- 637 18 Sandkam, B. A., Young, C. M., Breden, F. M., Bourne, G. R. & Breden, F. Color  
638 vision varies more among populations than among species of live-bearing fish  
639 from South America. *BMC Evol. Biol.* **15**, 225, doi:10.1186/s12862-015-0501-3  
640 (2015).
- 641 19 Bourne, G. R., Breden, F. & Allen, T. C. Females prefer carotenoid colored males  
642 as mates in the pentamorphic livebearing fish, *Poecilia parae*.  
643 *Naturwissenschaften* **90**, 402-405, doi:10.1007/s00114-003-0444-1 (2003).
- 644 20 Liley, N. R. *Reproductive Isolation in some sympatric species of fishes* Doctor of  
645 Philosophy thesis, Oxford, (1963).
- 646 21 Darolti, I. *et al.* Extreme heterogeneity in sex chromosome differentiation and  
647 dosage compensation in livebearers. *Proceedings of the National Academy of*  
648 *Sciences* **116**, 19031-19036, doi:10.1073/pnas.1905298116 (2019).
- 649 22 Wright, A. *et al.* Convergent recombination suppression suggests a role of sexual  
650 selection in guppy sex chromosome formation. *Nature Communications* **8**, 14251  
651 (2017).
- 652 23 Darolti, I., Wright, A. E. & Mank, J. E. Guppy Y Chromosome Integrity Maintained  
653 by Incomplete Recombination Suppression. *Genome Biol Evol* **12**, 965-977,  
654 doi:10.1093/gbe/evaa099 (2020).
- 655 24 Almeida, P. *et al.* Divergence and Remarkable Diversity of the Y Chromosome in  
656 Guppies. *bioRxiv*, doi:10.1101/2020.07.13.200196 (2020).
- 657 25 Reznick, D. N., Miles, D. B. & Winslow, S. Life History of *Poecilia picta*  
658 (Poeciliidae) from the Island of Trinidad. *Copeia* **1992**, 782-790,  
659 doi:10.2307/1446155 (1992).
- 660 26 Haskins, C. P. & Haskins, E. F. The role of sexual selection as an isolating  
661 mechanism in three species of Poeciliid fishes. *Evolution* **3**, 160-169 (1949).
- 662 27 Liley, N. R. Ethological Isolating Mechanisms in Four Sympatric Species of  
663 Poeciliid Fishes. *Behaviour Supplement* **13**, 1-197 (1966).
- 664 28 Vicoso, B. & Bachtrog, D. Reversal of an ancient sex chromosome to an  
665 autosome in *Drosophila*. *Nature* **499**, 332-335, doi:10.1038/nature12235 (2013).
- 666 29 Vicoso, B. & Bachtrog, D. Numerous transitions of sex chromosomes in Diptera.  
667 *PLoS Biol.* **13**, e1002078, doi:10.1371/journal.pbio.1002078 (2015).
- 668 30 Vicoso, B., Emerson, J. J., Zektser, Y., Mahajan, S. & Bachtrog, D. Comparative  
669 sex chromosome genomics in snakes: differentiation, evolutionary strata, and  
670 lack of global dosage compensation. *PLoS Biol.* **11**, e1001643,  
671 doi:10.1371/journal.pbio.1001643 (2013).
- 672 31 Kim, J. *et al.* Reference-assisted chromosome assembly. **110**, 1785-1790,  
673 doi:10.1073/pnas.1220349110 %J Proceedings of the National Academy of  
674 Sciences (2013).
- 675 32 Pucholt, P., Wright, A. E., Conze, L. L., Mank, J. E. & Berlin, S. Recent Sex  
676 Chromosome Divergence despite Ancient Dioecy in the Willow *Salix viminalis*.  
677 *Mol. Biol. Evol.* **34**, 1991-2001, doi:10.1093/molbev/msx144 (2017).

- 678 33 Akagi, T., Henry, I. M., Tao, R. & Comai, L. A Y-chromosome-encoded small  
679 RNA acts as a sex determinant in persimmons. *Science* **346** (2014).
- 680 34 Torres, M. F. *et al.* Genus-wide sequencing supports a two-locus model for sex-  
681 determination in Phoenix. *Nat Commun* **9**, 3969, doi:10.1038/s41467-018-06375-  
682 y (2018).
- 683 35 Morris, J., Darolti, I., Bloch, N. I., Wright, A. E. & Mank, J. E. Shared and  
684 Species-Specific Patterns of Nascent Y Chromosome Evolution in Two Guppy  
685 Species. *Genes (Basel)* **9**, doi:10.3390/genes9050238 (2018).
- 686 36 Napolitano, L. M. & Meroni, G. TRIM family: Pleiotropy and diversification  
687 through homomultimer and heteromultimer formation. *IUBMB Life* **64**, 64-71,  
688 doi:10.1002/iub.580 (2012).
- 689 37 Sardiello, M., Cairo, S., Fontanella, B., Ballabio, A. & Meroni, G. Genomic  
690 analysis of the TRIM family reveals two groups of genes with distinct evolutionary  
691 properties. *BMC Evol. Biol.* **8**, 225, doi:10.1186/1471-2148-8-225 (2008).
- 692 38 Karki, R. *et al.* NLRC3 is an inhibitory sensor of PI3K-mTOR pathways in cancer.  
693 *Nature* **540**, 583-587, doi:10.1038/nature20597 (2016).
- 694 39 Sandkam, B. A. *et al.* Tbx2a Modulates Switching of RH2 and LWS Opsin Gene  
695 Expression. *Mol. Biol. Evol.* **37**, 2002-2014, doi:10.1093/molbev/msaa062 (2020).
- 696 40 Showell, C., Christine, K. S., Mandel, E. M. & Conlon, F. L. Developmental  
697 expression patterns of Tbx1, Tbx2, Tbx5, and Tbx20 in *Xenopus tropicalis*. *Dev.*  
698 *Dyn.* **235**, 1623-1630, doi:10.1002/dvdy.20714 (2006).
- 699 41 Gibson-Brown, J. J., S, I. A., Silver, L. M. & Papaioannou, V. E. Expression of T-  
700 box genes Tbx2-Tbx5 during chick organogenesis. *Mech Dev* **74**, 165-169  
701 (1998).
- 702 42 Tomaszewicz, M., Chalopin, D., Scharl, M., Galiana, D. & Volff, J.-N. A  
703 multicopy Y-chromosomal SGNH hydrolase gene expressed in the testis of the  
704 platyfish has been captured and mobilized by a Helitron transposon. *BMC Genet.*  
705 **15** (2014).
- 706 43 Rabosky, D. L. *et al.* An inverse latitudinal gradient in speciation rate for marine  
707 fishes. *Nature* **559**, 392-395, doi:10.1038/s41586-018-0273-1 (2018).
- 708 44 Felsenstein, J. The evolutionary advantage of recombination. *Genetics* **78**, 737-  
709 756 (1974).
- 710 45 Lenormand, T., Fyon, F., Sun, E. & Roze, D. Sex Chromosome Degeneration by  
711 Regulatory Evolution. *Curr. Biol.*, doi:10.1016/j.cub.2020.05.052 (2020).
- 712 46 Wright, A. E., Dean, R., Zimmer, F. & Mank, J. E. How to make a sex  
713 chromosome. *Nat Commun* **7**, 12087, doi:10.1038/ncomms12087 (2016).
- 714 47 Hough, J., Wang, W., Barrett, S. C. H. & Wright, S. I. Hill-Robertson Interference  
715 Reduces Genetic Diversity on a Young Plant Y-Chromosome. *Genetics* **207**, 685  
716 (2017).
- 717 48 Marais, G. A. *et al.* Evidence for degeneration of the Y chromosome in the  
718 dioecious plant *Silene latifolia*. *Curr. Biol.* **18**, 545-549,  
719 doi:10.1016/j.cub.2008.03.023 (2008).
- 720 49 Bachtrog, D. & Charlesworth, B. Reduced adaptation of a non-recombining neo-  
721 Y chromosome. *Nature* **416**, 323-326, doi:10.1038/416323a (2002).

- 722 50 Mank, J. E. Small but mighty: the evolutionary dynamics of W and Y sex  
723 chromosomes. *Chromosome Res* **20**, 21-33, doi:10.1007/s10577-011-9251-2  
724 (2012).
- 725 51 Kaiser, V. B. & Charlesworth, B. Muller's ratchet and the degeneration of the  
726 *Drosophila miranda* neo-Y chromosome. *Genetics* **185**, 339-348,  
727 doi:10.1534/genetics.109.112789 (2010).
- 728 52 Keightley, P. D. & Otto, S. P. Interference among deleterious mutations favours  
729 sex and recombination in finite populations. *Nature* **443**, 89-92,  
730 doi:10.1038/nature05049 (2006).
- 731 53 Ritz, K. R., Noor, M. A. F. & Singh, N. D. Variation in Recombination Rate:  
732 Adaptive or Not? *Trends Genet.* **33**, 364-374, doi:10.1016/j.tig.2017.03.003  
733 (2017).
- 734 54 Ellegren, H. Characteristics, causes and evolutionary consequences of male-  
735 biased mutation. *Proc Biol Sci* **274**, 1-10, doi:10.1098/rspb.2006.3720 (2007).
- 736 55 Tennessen, J. A. *et al.* Repeated translocation of a gene cassette drives sex-  
737 chromosome turnover in strawberries. *PLoS Biol.* **16**, e2006062,  
738 doi:10.1371/journal.pbio.2006062 (2018).
- 739 56 Bourque, G. *et al.* Ten things you should know about transposable elements.  
740 *Genome Biol* **19**, 199, doi:10.1186/s13059-018-1577-z (2018).
- 741 57 Carleton, K. L. *et al.* Movement of transposable elements contributes to cichlid  
742 diversity. doi:10.1101/2020.02.26.961987 (2020).
- 743 58 Brawand, D. *et al.* The genomic substrate for adaptive radiation in African cichlid  
744 fish. *Nature* **513**, 375+, doi:10.1038/nature13726 (2014).
- 745 59 Auvinet, J. *et al.* Mobilization of retrotransposons as a cause of chromosomal  
746 diversification and rapid speciation: the case for the Antarctic teleost genus  
747 *Trematomus*. *BMC Genomics* **19**, 339, doi:10.1186/s12864-018-4714-x (2018).
- 748 60 Naville, M. *et al.* Not so bad after all: retroviruses and long terminal repeat  
749 retrotransposons as a source of new genes in vertebrates. *Clin. Microbiol. Infect.*  
750 **22**, 312-323, doi:10.1016/j.cmi.2016.02.001 (2016).
- 751 61 Sinervo, B. & Calsbeek, R. The Developmental, Physiological, Neural, and  
752 Genetical Causes and Consequences of Frequency-Dependent Selection in the  
753 Wild. *Annual Review of Ecology, Evolution, and Systematics* **37**, 581-610,  
754 doi:10.1146/annurev.ecolsys.37.091305.110128 (2006).
- 755 62 Sinervo, B. & Lively, C. M. The rock-paper-scissors game and the evolution of  
756 alternative male strategies. *Nature* **380**, 240-243, doi:DOI 10.1038/380240a0  
757 (1996).
- 758 63 Hartl, D. L. & Clark, A. G. *Principles of Population Genetics*. (Sinauer  
759 Associates, 1997).
- 760 64 Lank, D. B., Smith, C. M., Hanotte, O., Burke, T. & Cooke, F. Genetic  
761 polymorphism for alternative mating behaviour in lekking male ruff *Philomachus*  
762 *pugnax*. *Nature* **378**, 59-62, doi:DOI 10.1038/378059a0 (1995).
- 763 65 Tuttle, E. M. *et al.* Divergence and Functional Degradation of a Sex  
764 Chromosome-like Supergene. *Curr. Biol.* **26**, 344-350,  
765 doi:10.1016/j.cub.2015.11.069 (2016).
- 766 66 Hunt, B. G. Supergene Evolution: Recombination Finds a Way. *Curr. Biol.* **30**,  
767 R73-R76, doi:10.1016/j.cub.2019.12.006 (2020).

- 768 67 Charlesworth, D. The status of supergenes in the 21st century: recombination  
769 suppression in Batesian mimicry and sex chromosomes and other complex  
770 adaptations. *Evol Appl* **9**, 74-90, doi:10.1111/eva.12291 (2016).
- 771 68 Joron, M. *et al.* Chromosomal rearrangements maintain a polymorphic  
772 supergene controlling butterfly mimicry. *Nature* **477**, 203-206,  
773 doi:10.1038/nature10341 (2011).
- 774 69 Bolger, A. M., Lohse, M. & Usadel, B. Trimmomatic: a flexible trimmer for Illumina  
775 sequence data. *Bioinformatics* **30**, 2114-2120, doi:10.1093/bioinformatics/btu170  
776 (2014).
- 777 70 Elyanow, R., Wu, H.-T. & Raphael, B. J. Identifying structural variants using  
778 linked-read sequencing data. *Bioinformatics (Oxford, England)* **34**, 353-360,  
779 doi:10.1093/bioinformatics/btx712 (2018).
- 780 71 Harris, R. S. *Improved pairwise alignment of genomic DNA* Doctor of Philosophy  
781 thesis, Penn State, (2007).
- 782 72 Kent, W. J., Baertsch, R., Hinrichs, A., Miller, W. & Haussler, D. Evolution's  
783 cauldron: duplication, deletion, and rearrangement in the mouse and human  
784 genomes. *P Natl Acad Sci USA* **100**, 11484-11489,  
785 doi:10.1073/pnas.1932072100 (2003).
- 786 73 Langmead, B. & Salzberg, S. L. Fast gapped-read alignment with Bowtie 2. *Nat.*  
787 *Methods* **9**, 357 (2012).
- 788 74 Li, H. & Durbin, R. Fast and accurate long-read alignment with Burrows–Wheeler  
789 transform. *Bioinformatics* **26**, 589-595, doi:10.1093/bioinformatics/btp698 (2010).
- 790 75 Palmer, D. H., Rogers, T. F., Dean, R. & Wright, A. E. How to identify sex  
791 chromosomes and their turnover. *Mol. Ecol.* **28**, 4709-4724,  
792 doi:10.1111/mec.15245 (2019).
- 793 76 Ronquist, F. *et al.* MrBayes 3.2: efficient Bayesian phylogenetic inference and  
794 model choice across a large model space. *Syst. Biol.* **61**, 539-542,  
795 doi:10.1093/sysbio/sys029 (2012).
- 796 77 Carvalho, A. B. & Clark, A. G. Efficient identification of Y chromosome  
797 sequences in the human and *Drosophila* genomes. *Genome Res.* **23**, 1894-  
798 1907, doi:10.1101/gr.156034.113 (2013).
- 799 78 Carvalho, A. B., Vicoso, B., Russo, C. A., Swenor, B. & Clark, A. G. Birth of a  
800 new gene on the Y chromosome of *Drosophila melanogaster*. *P Natl Acad Sci*  
801 *USA* **112**, 12450-12455, doi:10.1073/pnas.1516543112 (2015).
- 802 79 Holt, C. & Yandell, M. MAKER2: an annotation pipeline and genome-database  
803 management tool for second-generation genome projects. *BMC Bioinformatics*  
804 **12**, 491, doi:10.1186/1471-2105-12-491 (2011).
- 805 80 RepeatModeler Open-1.0 (<http://www.repeatmasker.org>, 2015).
- 806 81 RepeatMasker Open-4.0 (<http://www.repeatmasker.org>, 2015).
- 807 82 Howe, K. L. *et al.* Ensembl Genomes 2020-enabling non-vertebrate genomic  
808 research. *Nucleic Acids Res.* **48**, D689-D695, doi:10.1093/nar/gkz890 (2020).
- 809 83 Dreyer, C. *et al.* ESTs and EST-linked polymorphisms for genetic mapping and  
810 phylogenetic reconstruction in the guppy, *Poecilia reticulata*. *BMC Genomics* **8**,  
811 269, doi:10.1186/1471-2164-8-269 (2007).

- 812 84 Sharma, E. *et al.* Transcriptome assemblies for studying sex-biased gene  
813 expression in the guppy, *Poecilia reticulata*. *BMC Genomics* **15**, 400,  
814 doi:10.1186/1471-2164-15-400 (2014).
- 815 85 Pertea, M. *et al.* StringTie enables improved reconstruction of a transcriptome  
816 from RNA-seq reads. *Nat. Biotechnol.* **33**, 290-295, doi:10.1038/nbt.3122 (2015).
- 817 86 Stanke, M. *et al.* AUGUSTUS: ab initio prediction of alternative transcripts.  
818 *Nucleic Acids Res.* **34**, W435-439, doi:10.1093/nar/gkl200 (2006).
- 819 87 Seppey, M., Manni, M. & Zdobnov, E. M. in *Gene Prediction* 227-245  
820 (Springer, 2019).
- 821 88 Korf, I. Gene finding in novel genomes. *BMC Bioinformatics* **5**, 59,  
822 doi:10.1186/1471-2105-5-59 (2004).
- 823
