# Supplementary material for: Extreme Y chromosome polymorphism corresponds to five male reproductive morphs
Source: bioRxiv or medRxiv preprint supplement (doi:10.1101/2020.08.19.258434), 2020-08-20
Supplement: Supplementary file [file media-1.pdf]

Supplementary Information for

## Extreme Y chromosome polymorphism corresponds to five extreme male reproductive morphs

Benjamin A Sandkam\*, Pedro Almeida, Iulia Darolti, Benjamin Furman, Wouter van der Bijl, Jake Morris, Godfrey Bourne, Felix Breden, Judith E. Mank

\*Benjamin A Sandkam

Email: [sandkam@zoology.ubc.ca](mailto:sandkam@zoology.ubc.ca)

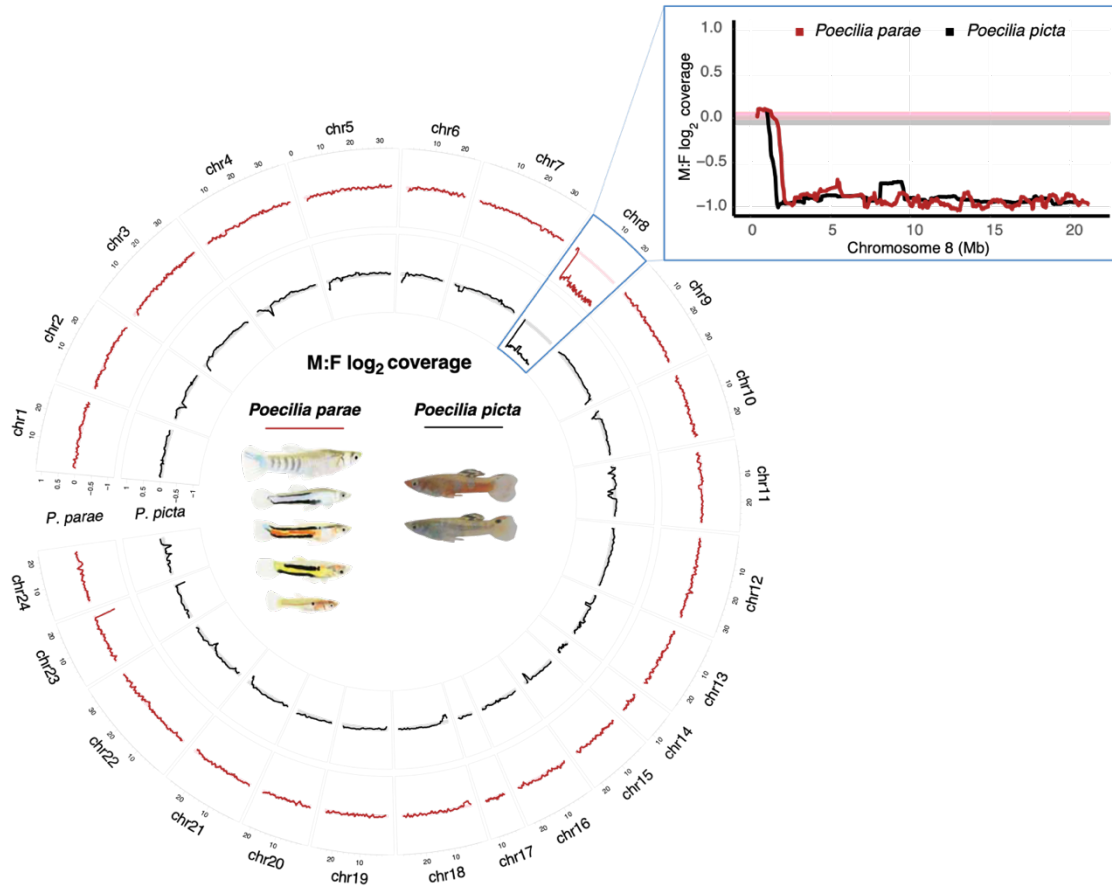

**Fig. S1.** Divergence between X and Y in *Poecilia parae* and the sister species *Poecilia picta* indicate recombination was stopped before the five morphs controlled by the Y chromosome evolved in *Poecilia parae*. M:F log<sub>2</sub> coverage of RACA anchored scaffolds for all five morphs of *P. parae* (red) and the close relative *P. picta* (black) (Darolti *et al.* 2019). Lines represent sliding window of 15 scaffolds. Shaded bars represent the 95% confidence interval based on bootstrapping coverage across the autosomes for *P. parae* (pink) and *P. picta* (grey).

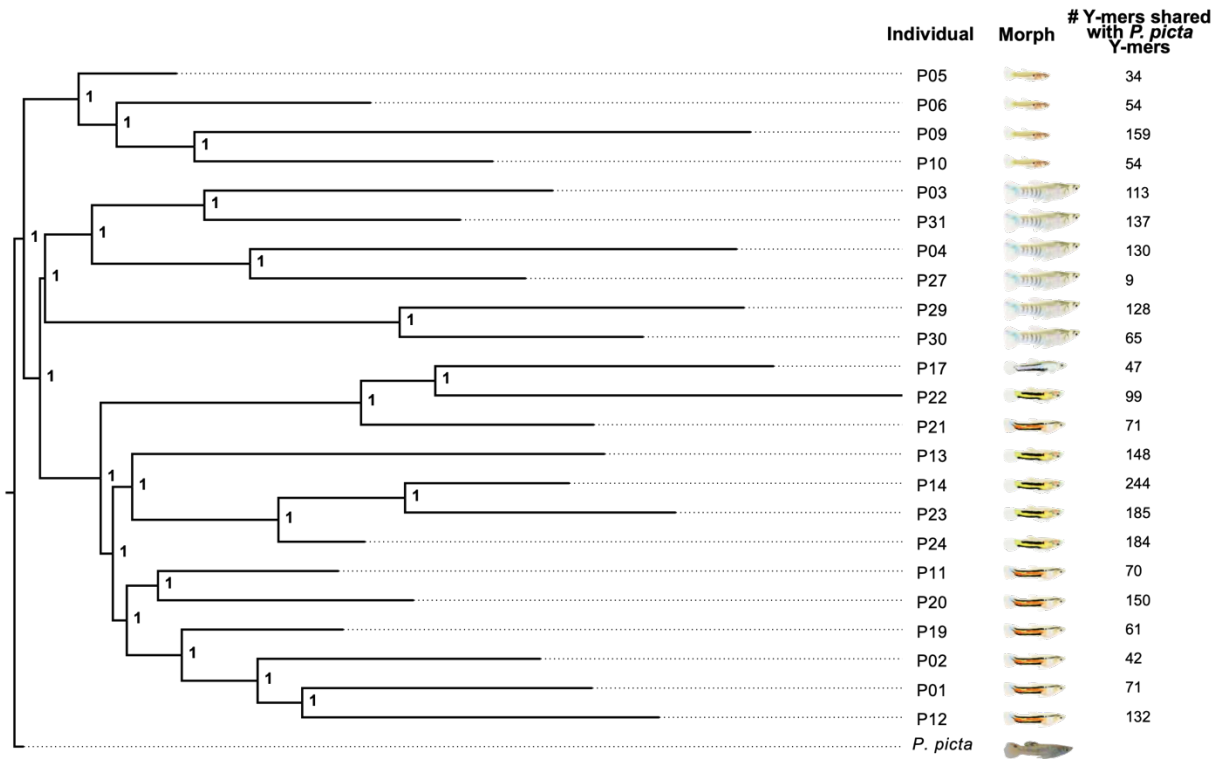

**Fig. S2.** Bayesian phylogeny built on presence/absence of the 27,950,090 *P. parae* Y-mers and the 646,754 *P. picta* Y-mers in each individual and rooted on *P. picta* (as in Figure 2). The posterior probability is presented at each node. The number of Y-mers each individual shares with *P. picta* Y-mers is denoted to the right. *P. picta* Y-mers are distributed across all morphs indicating that they have been segregating on non-recombining regions of the Y chromosome since recombination was stopped in the common ancestor of *P. parae* and *P. picta*.

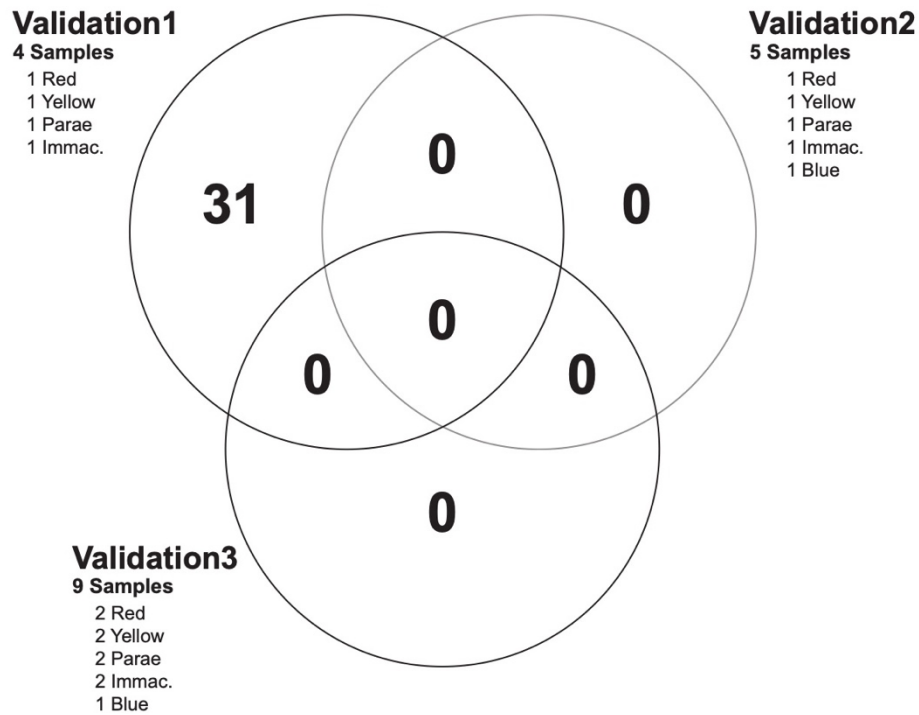

**Fig. S3.** Validation of morph-mer identification pipeline using random sets of individuals from each of the different morphs. Different samples were used for each set except for blue where the 1 sample was used in validation set 2 and validation set 3. There were a low number of Y-mers unique to sets of four random individuals and zero Y-mers unique to sets with more than four individuals. This demonstrates the false positive rate of our analysis was quite low because all major morphs had at least four individuals.

### Melanzona-mers

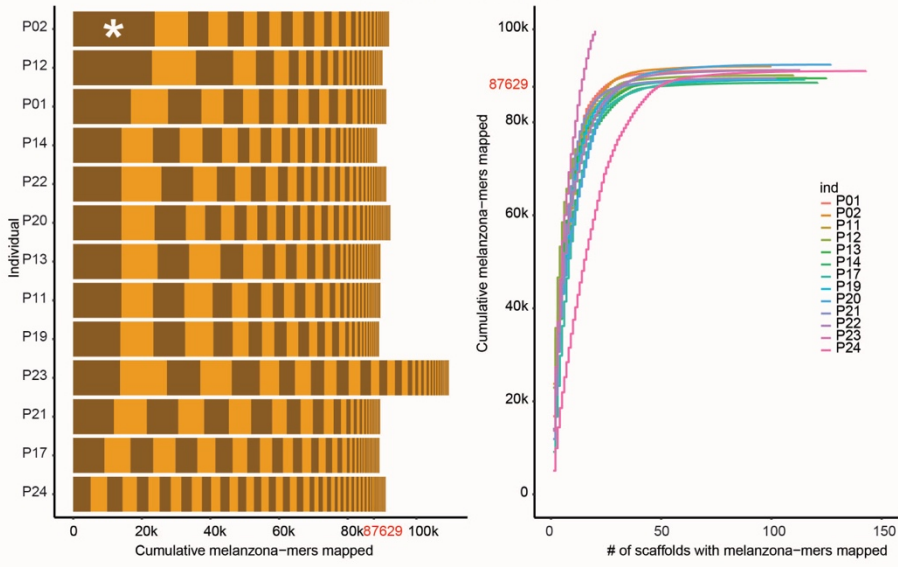

### Parae-mers

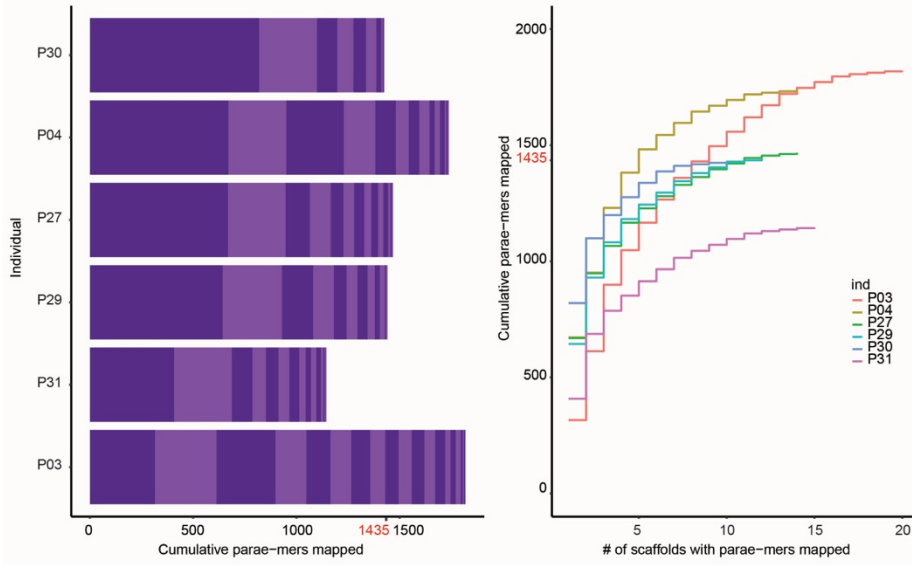

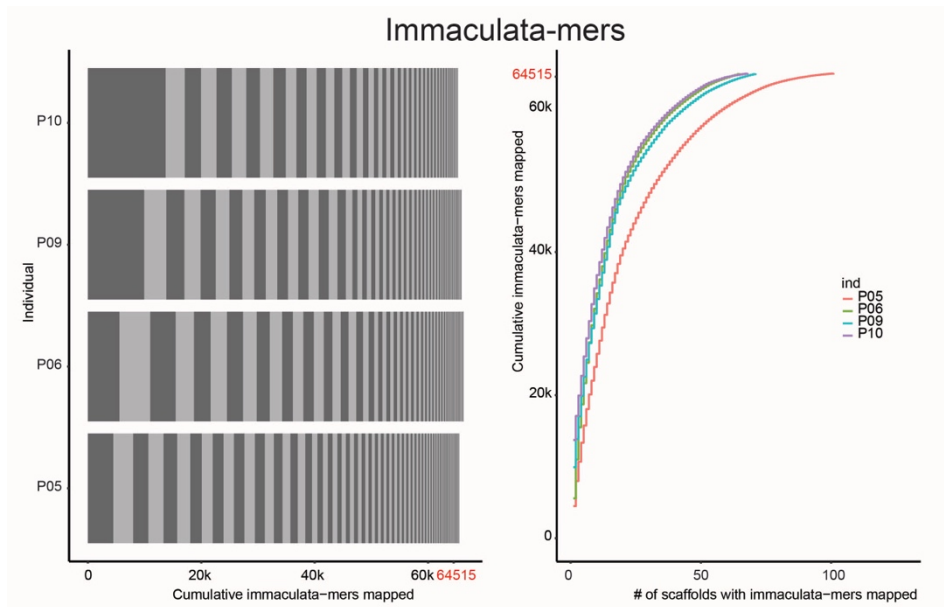

**Fig. S4.** Mapping distribution for each set of morph-mers mapped to *de novo* scaffolds of males of that morph with no mismatches, gaps, or trimming. Left: cumulative morph-mers mapped for each individual, each change in hue is a different scaffold. A large percentage of morph-mers generally map to just one or a few scaffolds indicating that our *k*-mer approach reveals regions of highly diverged morph specific sequence rather than single SNPs distributed throughout the genome. Right: cumulative morph-mers mapped presented as a function of the number of scaffolds. The strong deviation from 1:1 shows morph-mer mapping is non-random and further supports the morph-mers approach is identifying regions of morph specific sequence. The total number of unique morph-mers identified for that morph is indicated in red on the axis (note the variation in number of morph-mers mapped is due to some individuals having morph-mers map to multiple scaffolds). Asterix in P02 of the melanzona-mers indicates the example alignment scaffold with melanzona-mers presented in Supplementary Figure 4.

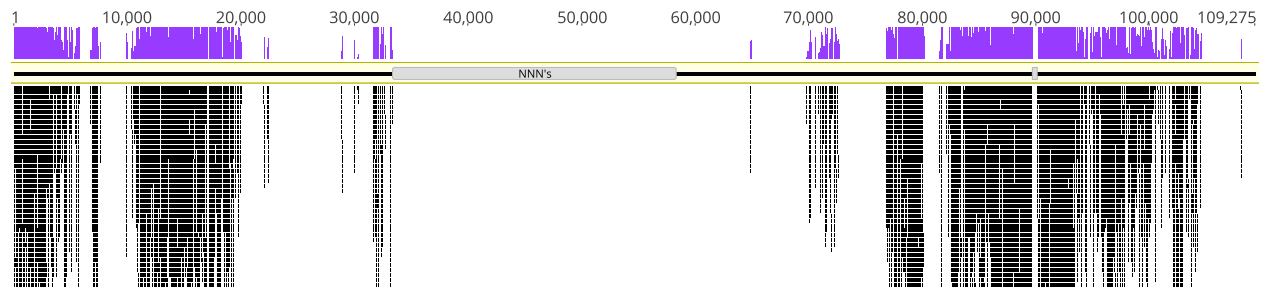

**Fig. S5.** Melanzona-mers aligned to scaffold 104666 of sample P02 with no mismatches, gaps, or trimming. Each 31bp melanzona-mer is shown aligned below the reference sequence, and coverage is shown in purple above the reference sequence. Of the 87,629 unique melanzona-mers; 23,773 aligned to this scaffold. Regions of Ns are denoted on the reference genome in grey and could explain a lack of melanzona-mers aligning to these regions. The strong clustering and overlapping nature of the melanzona-mers indicates sequence is highly diverged both from females and from the other morphs.

**Table S1.** Phenotypic characteristics that differ across the five male morphs of *Poecilia parae*.

|                                   |  |  |  |  |  | Ref.  |
|-----------------------------------|-----------------------------------------------------------------------------------|-----------------------------------------------------------------------------------|------------------------------------------------------------------------------------|-------------------------------------------------------------------------------------|-------------------------------------------------------------------------------------|-------|
| <i>Physiology</i>                 |                                                                                   |                                                                                   |                                                                                    |                                                                                     |                                                                                     |       |
| <b>Body Size</b>                  | Large                                                                             | Small                                                                             | Medium                                                                             | Medium                                                                              | Medium                                                                              | 1     |
| <b>Color Pattern</b>              | Vertical stripes                                                                  | Resembles juvenile female                                                         | Horizontal stripes                                                                 | Horizontal stripes                                                                  | Horizontal stripes                                                                  | 1,2,3 |
| <b>Coloration</b>                 | Silver/purple                                                                     | None                                                                              | Red                                                                                | Yellow                                                                              | Blue                                                                                | 1,2,3 |
| <b>Absolute Testis Mass</b>       | Medium (90% of immaculata)                                                        | Largest                                                                           | Small (70% of immaculata)                                                          | Medium (90% of immaculata)                                                          | Small (70% of immaculata)                                                           | 1     |
| <b>Testis/Body Mass</b>           | Intermediate                                                                      | High                                                                              | Low                                                                                | Intermediate                                                                        | Low                                                                                 | 1     |
| <b>Sperm Midpiece</b>             | Long                                                                              | Short                                                                             | Long                                                                               | Long                                                                                | Long                                                                                | 1     |
| <b>Flagellum Length</b>           | Short                                                                             | Long                                                                              | Short                                                                              | Intermediate                                                                        | Short                                                                               | 1     |
| <b>Sperm per Ejaculate</b>        | Fewer                                                                             | Most                                                                              | Fewer                                                                              | Fewer                                                                               | Fewer                                                                               | 1     |
| <b>Sperm Length</b>               | Short                                                                             | Long                                                                              | Short                                                                              | Long                                                                                | Short                                                                               | 1     |
| <i>Behavior</i>                   |                                                                                   |                                                                                   |                                                                                    |                                                                                     |                                                                                     |       |
| <b>Interaction w/ other males</b> | Highly aggressive                                                                 | Non-aggressive                                                                    | Aggressive                                                                         | Aggressive                                                                          | Non-aggressive                                                                      | 3     |
| <b>Courtship Behavior</b>         | Force copulate                                                                    | Sneak copulate                                                                    | Display                                                                            | Display                                                                             | Display                                                                             | 1     |

(1) Hurtado-Gonzales and Uy. 2009. *Anim. Behav.* **77**,1187-1194. (2) Lindholm *et al.* 2004. *Heredity* **92**, 156-162.  
 (3) Hurtado-Gonzales and Uy. 2010. *BMC Evol Biol* **10**, 391. (4) Liley. 1966. *Behaviour Supplement* **13**, 1-197.



**Table S2.** Sequencing method (10X Chromium linked reads or direct PE Illumina) and number of paired reads used for coverage analyses of all 40 wild caught individuals.

| <b>Morph</b>            | <b>Sample</b> | <b>Population</b> | <b>Sequencing</b> | <b># Paired Reads</b> |
|-------------------------|---------------|-------------------|-------------------|-----------------------|
| <b>Females</b>          | P 15          | Cemetery          | 10X               | 566,474,152           |
|                         | P 26          | Seawall Trench    | 10X               | 586,091,672           |
|                         | P 32          | Cemetery          | 10X               | 642,872,944           |
|                         | P 34          | Seawall Trench    | 10X               | 599,429,008           |
|                         | P 36          | Cemetery          | 10X               | 587,807,726           |
|                         | P 37          | Seawall Trench    | 10X               | 586,019,978           |
|                         | P 16          | Cemetery          | Illumina          | 755,768,880           |
|                         | P 25          | Seawall Trench    | Illumina          | 861,217,302           |
|                         | P 33          | Cemetery          | Illumina          | 591,002,416           |
|                         | P 35          | Cemetery          | Illumina          | 813,848,774           |
|                         | P 39          | Seawall Trench    | Illumina          | 541,464,112           |
| <b>Immaculata Morph</b> | P 05          | Seawall Trench    | 10X               | 665,696,764           |
|                         | P 06          | Seawall Trench    | 10X               | 687,641,508           |
|                         | P 09          | Seawall Trench    | 10X               | 666,405,666           |
|                         | P 10          | Seawall Trench    | 10X               | 628,472,300           |
|                         | P 40          | Seawall Trench    | Illumina          | 492,568,288           |
| <b>Parae Morph</b>      | P 03          | Seawall Trench    | 10X               | 636,937,278           |
|                         | P 04          | Seawall Trench    | 10X               | 673,606,290           |
|                         | P 27          | Seawall Trench    | 10X               | 682,154,596           |
|                         | P 29          | Seawall Trench    | 10X               | 697,480,156           |
|                         | P 30          | Seawall Trench    | 10X               | 598,808,486           |
|                         | P 31          | Seawall Trench    | 10X               | 634,574,988           |

|                               |      |                |          |             |
|-------------------------------|------|----------------|----------|-------------|
|                               | P 28 | Cemetery       | Illumina | 799,757,386 |
| <b>Red Melanzona Morph</b>    | P 01 | Cemetery       | 10X      | 605,264,908 |
|                               | P 02 | Cemetery       | 10X      | 599,899,768 |
|                               | P 11 | Seawall Trench | 10X      | 663,454,532 |
|                               | P 12 | Cemetery       | 10X      | 679,401,488 |
|                               | P 19 | Cemetery       | 10X      | 619,323,522 |
|                               | P 20 | Seawall Trench | 10X      | 614,834,422 |
|                               | P 21 | Cemetery       | 10X      | 564,829,682 |
|                               | P 38 | Seawall Trench | Illumina | 789,618,098 |
| <b>Yellow Melanzona Morph</b> | P 13 | Seawall Trench | 10X      | 632,280,752 |
|                               | P 14 | West Watuka    | 10X      | 622,311,946 |
|                               | P 22 | Seawall Trench | 10X      | 649,735,580 |
|                               | P 23 | West Watuka    | 10X      | 674,089,582 |
|                               | P 24 | West Watuka    | 10X      | 587,826,556 |
| <b>Blue Melanzona Morph</b>   | P 17 | Cemetery       | 10X      | 705,952,894 |
|                               | P 07 | Seawall Trench | Illumina | 771,876,214 |
|                               | P 08 | Cemetery       | Illumina | 479,310,754 |
|                               | P 18 | Seawall Trench | Illumina | 813,513,894 |

**Table S3.** Assembly statistics for each of the 29 genomes *de novo* assembled by Supernova. Bold samples indicate those used for follow-up coverage analyses. Genome size is expected to be ~730MB based on close relatives with known genome sizes (*Poecilia reticulata* 731Mb, *Xiphophorus helleri* 730Mb).

| Morph            | Sample     | Assembly Size (MB) | Scaffold N50 (kb) | No. Scaffolds $\geq 10$ kb | No. Scaffolds $\geq 1$ kb | Contig N50 (kb) | Phased N50 (kb) | Coverage   |
|------------------|------------|--------------------|-------------------|----------------------------|---------------------------|-----------------|-----------------|------------|
| Red Melanzona    | <b>P01</b> | <b>663.83</b>      | <b>3201.95</b>    | <b>2081</b>                | <b>20376</b>              | <b>38.36</b>    | <b>2252.96</b>  | <b>53X</b> |
|                  | P02        | 664.43             | 2150.00           | 2493                       | 20516                     | 38.78           | 1359.88         | 51X        |
|                  | P11        | 562.45             | 44.07             | 17986                      | 70941                     | 23.36           | 70.98           | 52X        |
|                  | P12        | 661.61             | 3683.18           | 2114                       | 22269                     | 37.97           | 2240.87         | 60X        |
|                  | P19        | 582.84             | 47.86             | 17071                      | 67134                     | 23.08           | 100.55          | 48X        |
|                  | P20        | 611.40             | 45.28             | 18734                      | 63207                     | 23.45           | 94.87           | 42X        |
|                  | P21        | 665.11             | 1679.06           | 2677                       | 20797                     | 38.28           | 1266.47         | 51X        |
| Yellow Melanzona | P13        | 654.30             | 1212.01           | 3205                       | 23821                     | 36.88           | 1120.80         | 53X        |
|                  | P14        | 616.95             | 50.94             | 16711                      | 58496                     | 24.61           | 115.13          | 49X        |
|                  | P22        | 665.85             | 61.08             | 15566                      | 53875                     | 27.00           | 137.91          | 46X        |
|                  | P23        | 655.37             | 97.46             | 12443                      | 43298                     | 27.22           | 190.30          | 61X        |
|                  | P24        | 234.10             | 17.09             | 13932                      | 117930                    | 13.32           | 5.82            | 45X        |
| Blue Melanzona   | P17        | 654.75             | 1995.50           | 2568                       | 23989                     | 33.84           | 1598.03         | 63X        |
| Parae Morph      | P03        | 655.50             | 93.43             | 12361                      | 43771                     | 28.68           | 165.34          | 51X        |
|                  | <b>P04</b> | <b>658.87</b>      | <b>599.09</b>     | <b>4375</b>                | <b>25416</b>              | <b>34.50</b>    | <b>599.94</b>   | <b>55X</b> |
|                  | P27        | 667.40             | 274.95            | 6754                       | 28937                     | 30.94           | 312.62          | 59X        |
|                  | P29        | 599.06             | 38.95             | 20291                      | 68801                     | 21.92           | 84.43           | 46X        |
|                  | P30        | 341.91             | 20.87             | 17566                      | 108816                    | 15.66           | 40.56           | 39X        |
|                  | P31        | 604.74             | 39.45             | 20427                      | 65373                     | 21.69           | 91.41           | 44X        |
| Immaculata       | P05        | 71.97              | 14.71             | 4740                       | 138919                    | 13.03           | 5.44            | 42X        |
|                  | P06        | 623.35             | 46.83             | 18525                      | 62105                     | 24.07           | 105.78          | 53X        |

|               |            |               |                |              |              |              |                |            |
|---------------|------------|---------------|----------------|--------------|--------------|--------------|----------------|------------|
|               | <b>P09</b> | <b>651.69</b> | <b>3308.41</b> | <b>2291</b>  | <b>22613</b> | <b>35.38</b> | <b>2284.14</b> | <b>61X</b> |
|               | P10        | 650.86        | 105.21         | 11446        | 39921        | 28.88        | 183.48         | 52X        |
| <b>Female</b> | P15        | 69.89         | 15.53          | 4441         | 140510       | 13.68        | 3.91           | 44X        |
|               | P26        | 96.86         | 13.50          | 6848         | 144112       | 11.90        | 6.34           | 38X        |
|               | <b>P32</b> | <b>600.79</b> | <b>40.57</b>   | <b>19565</b> | <b>62451</b> | <b>23.02</b> | <b>75.27</b>   | <b>48X</b> |
|               | P34        | 508.35        | 34.52          | 18503        | 79658        | 20.75        | 92.35          | 37X        |
|               | P36        | 329.51        | 23.33          | 15804        | 103659       | 16.40        | 35.28          | 18X        |
|               | P37        | 382.74        | 23.43          | 18121        | 95193        | 17.16        | 41.07          | 21X        |

**Table S4.** Amount of sequence in scaffolds with >5 morph-mers. Bold indicates samples used for annotation.

| <b>Morph</b>     | <b>Sample</b> | <b>Number of Scaffolds</b> | <b>Amount of sequence</b> |
|------------------|---------------|----------------------------|---------------------------|
| Melanzona Morph  | <b>P01</b>    | <b>77</b>                  | <b>995,370</b>            |
|                  | P02           | 80                         | 1,122,565                 |
|                  | P11           | 85                         | 865,095                   |
|                  | P12           | 81                         | 1,153,044                 |
|                  | P13           | 92                         | 1,610,202                 |
|                  | P14           | 91                         | 926,825                   |
|                  | P17           | 104                        | 4,250,903                 |
|                  | P19           | 82                         | 990,514                   |
|                  | P20           | 94                         | 877,954                   |
|                  | P21           | 80                         | 1,070,743                 |
|                  | P22           | 95                         | 1,164,800                 |
|                  | P23           | 98                         | 1,283,990                 |
|                  | P24           | 113                        | 668,430                   |
| Parae Morph      | P03           | 19                         | 164,531                   |
|                  | <b>P04</b>    | <b>14</b>                  | <b>127,542</b>            |
|                  | P27           | 14                         | 84,778                    |
|                  | P29           | 12                         | 90,235                    |
|                  | P30           | 9                          | 96,497                    |
|                  | P31           | 14                         | 114,805                   |
| Immaculata Morph | P05           | 126                        | 521,712                   |
|                  | P06           | 100                        | 1,035,078                 |
|                  | <b>P09</b>    | <b>100</b>                 | <b>9,748,162</b>          |
|                  | P10           | 81                         | 1,388,117                 |

**Table S5.** Genes annotated on the scaffolds with the Y-mers that are present in every male.

| <b>Gene Name</b>                                                              | <b>Copies</b> |
|-------------------------------------------------------------------------------|---------------|
| CRYBB1                                                                        | 3             |
| CRYBA4                                                                        | 1             |
| GGTA1                                                                         | 1             |
| Retrovirus-related Pol polyprotein from type-2 retrotransposable element R2DM |               |
| Retrovirus-related Pol polyprotein from type-1 retrotransposable element R2   |               |

**Table S6.** *Melanzona morph*: Genes predicted on sample P01 (red melanzona) scaffolds containing >5 melanzona-mers and >1.5-fold melanzona male: female coverage. Scaffolds with >0.025X coverage by melanzona males but <0.025X coverage by females are considered 'Male Unique'. Scaffolds with >0.025X coverage by melanzona males but <0.025X coverage by non-melanzona males are considered 'Melanzona Unique'.

| Gene                                       | P01 Scaffold | Melanzona:Female Coverage | Melanzona:Non-Melanzona Coverage |
|--------------------------------------------|--------------|---------------------------|----------------------------------|
| TRIM35                                     | 111589_P01   | Male Unique               | Melanzona Unique                 |
| Tbx3                                       | 113310_P01   | Male Unique               | 5.08                             |
| Tbx3                                       | 113310_P01   | Male Unique               | 5.08                             |
| Texim2                                     | 114702_P01   | Male Unique               | 14.57                            |
| KAT7                                       | 115621_P01   | Male Unique               | 4.09                             |
| Retrovirus-related                         | 111503_P01   | Male Unique               | 3.15                             |
| Texim3                                     | 111503_P01   | Male Unique               | 3.15                             |
| Translation initiation factor IF-2 (low E) | 112167_P01   | 15.69                     | 0.55                             |
| Texim2                                     | 103684_P01   | 13.63                     | 10.75                            |
| Unknown                                    | 103684_P01   | 13.63                     | 10.75                            |
| Unknown                                    | 111891_P01   | 8.69                      | 4.48                             |
| LINE-1 type transposase                    | 115646_P01   | 3.78                      | 3.52                             |
| Texim2                                     | 112537_P01   | 1.67                      | 2.12                             |
| Unknown                                    | 112537_P01   | 1.67                      | 2.12                             |
| Amyloid-beta A4 precursor                  | 116260_P01   | 1.91                      | 0.97                             |

**Table S7. *Immaculata morph*:** Genes predicted on sample P09 scaffolds containing >5 immaculata-mers and >1.5 fold immaculata male: female coverage. Scaffolds with >0.025X coverage by immaculata males but <0.025X coverage by females are considered 'Male Unique'. Scaffolds with >0.025X coverage by immaculata males but <0.025X coverage by non-immaculata males are considered 'Immaculata Unique'.

| Gene                    | P09 Scaffold | Immac:Female Coverage | Immac:Non-Immac Coverage |
|-------------------------|--------------|-----------------------|--------------------------|
| NLRC3                   | 124510_P09   | Male Unique           | Immaculata Unique        |
| Trim39                  | 125211_P09   | Male Unique           | Immaculata Unique        |
| Ty3 retrotransposon     | 141715_P09   | Male Unique           | 2.01                     |
| MSI1                    | 143420_P09   | Male Unique           | 11.57                    |
| Tbx3                    | 143386_P09   | Male Unique           | 2.40                     |
| Trypsin-2               | 143386_P09   | Male Unique           | 2.40                     |
| R2DM retrovirus         | 154564_P09   | Male Unique           | 3.94                     |
| Tbx3                    | 140269_P09   | Male Unique           | 1.62                     |
| TBX3                    | 87093_P09    | Male Unique           | 0.94                     |
| GPI-anchored protein 58 | 102953_P09   | 4.14                  | 8.25                     |
| NLRC3                   | 139939_P09   | 4.06                  | 7.46                     |
| unknown                 | 139939_P09   | 4.06                  | 7.46                     |
| NLRC3                   | 124079_P09   | 4.13                  | 3.01                     |
| Cetn3                   | 137893_P09   | 1.57                  | 1.15                     |
| Retrovirus PALBL        | 149075_P09   | 4.17                  | 2.08                     |
| Texim2                  | 131979_P09   | 3.90                  | 1.31                     |
| unknown                 | 126759_P09   | 5.56                  | 1.27                     |
| unknown                 | 148405_P09   | 3.56                  | 1.95                     |



**Table S8.** Scaffolds containing >5 of the 59 Y-mers present in all males contain 8,547 transposable elements in their 30,558,901bp.

| <b>Class/family</b> | <b>Copies identified by repeat masker</b> |
|---------------------|-------------------------------------------|
| DNA                 | 264                                       |
| DNA/CMC-EnSpm       | 297                                       |
| DNA/Crypton-V       | 10                                        |
| DNA/Dada            | 13                                        |
| DNA/Ginger-1        | 13                                        |
| DNA/IS3EU           | 62                                        |
| DNA/Kolobok-T2      | 32                                        |
| DNA/MULE-MuDR       | 27                                        |
| DNA/Maverick        | 99                                        |
| DNA/Merlin          | 31                                        |
| DNA/P               | 5                                         |
| DNA/PIF-Harbinger   | 63                                        |
| DNA/PIF-ISL2EU      | 63                                        |
| DNA/PiggyBac        | 12                                        |
| DNA/Sola-1          | 2                                         |
| DNA/TcMar           | 8                                         |
| DNA/TcMar-ISRm11    | 34                                        |
| DNA/TcMar-Tc1       | 4626                                      |
| DNA/TcMar-Tc2       | 30                                        |
| DNA/TcMar-Tigger    | 5                                         |
| DNA/Zisupton        | 31                                        |
| DNA/hAT             | 17                                        |
| DNA/hAT-Ac          | 314                                       |
| DNA/hAT-Blackjack   | 14                                        |
| DNA/hAT-Charlie     | 225                                       |
| DNA/hAT-Tip100      | 75                                        |

|                    |     |
|--------------------|-----|
| DNA/hAT-hAT5       | 35  |
| DNA/hAT-hAT6       | 11  |
| LINE/Dong-R4       | 120 |
| LINE/I             | 54  |
| LINE/L1            | 77  |
| LINE/L1-Tx1        | 30  |
| LINE/L2            | 776 |
| LINE/Penelope      | 14  |
| LINE/R2-Hero       | 2   |
| LINE/RTE-BovB      | 361 |
| LINE/Rex-Babar     | 399 |
| LTR/Copia          | 6   |
| LTR/ERV1           | 37  |
| LTR/Gypsy          | 113 |
| LTR/NGaro          | 65  |
| LTR/Pao            | 36  |
| RC/Helitron        | 22  |
| Retroposon         | 4   |
| SINE               | 1   |
| SINE/tRNA-Core-RTE | 1   |
| SINE/tRNA-V        | 7   |
| SINE/tRNA-V-RTE    | 4   |

**Table S9.** Scaffolds containing >5 melanazona-mers contain 392 transposable elements in their 995,370bp.

| <b>Class/family</b> | <b>Copies identified by repeat masker</b> |
|---------------------|-------------------------------------------|
| DNA                 | 13                                        |
| DNA/CMC-EnSpm       | 22                                        |
| DNA/Dada            | 1                                         |
| DNA/IS3EU           | 11                                        |
| DNA/Kolobok-T2      | 3                                         |
| DNA/Maverick        | 10                                        |
| DNA/Merlin          | 3                                         |
| DNA/PIF-Harbinger   | 1                                         |
| DNA/PIF-ISL2EU      | 1                                         |
| DNA/TcMar-Tc1       | 3                                         |
| DNA/Zisupton        | 2                                         |
| DNA/hAT             | 6                                         |
| DNA/hAT-Ac          | 27                                        |
| DNA/hAT-Charlie     | 28                                        |
| DNA/hAT-Tip100      | 2                                         |
| LINE/I              | 2                                         |
| LINE/L1             | 24                                        |
| LINE/L1-Tx1         | 2                                         |
| LINE/L2             | 38                                        |
| LINE/RTE-BovB       | 27                                        |
| LINE/Rex-Babar      | 1                                         |
| LTR/Copia           | 3                                         |
| LTR/ERV1            | 5                                         |
| LTR/Gypsy           | 43                                        |
| LTR/Pao             | 22                                        |
| RC/Helitron         | 90                                        |
| SINE/tRNA-Core-RTE  | 2                                         |

**Table S10.** Scaffolds containing >5 immaculata-mers contain 2,565 transposable elements in their 9,748,162bp.

| <b>Class/Family</b> | <b>Copies identified by repeat masker</b> |
|---------------------|-------------------------------------------|
| DNA                 | 103                                       |
| DNA/CMC-EnSpm       | 104                                       |
| DNA/Crypton-H       | 1                                         |
| DNA/Crypton-V       | 7                                         |
| DNA/Dada            | 4                                         |
| DNA/Ginger-1        | 3                                         |
| DNA/IS3EU           | 47                                        |
| DNA/Kolobok-T2      | 13                                        |
| DNA/MULE-MuDR       | 8                                         |
| DNA/MULE-NOF        | 1                                         |
| DNA/Maverick        | 25                                        |
| DNA/Merlin          | 25                                        |
| DNA/P               | 1                                         |
| DNA/PIF-Harbinger   | 20                                        |
| DNA/Sola-1          | 1                                         |
| DNA/TcMar           | 4                                         |
| DNA/TcMar-ISRm11    | 9                                         |
| DNA/TcMar-Tc1       | 1026                                      |
| DNA/TcMar-Tc2       | 21                                        |
| DNA/TcMar-Tigger    | 4                                         |
| DNA/Zisupton        | 8                                         |
| DNA/hAT             | 12                                        |
| DNA/hAT-Ac          | 145                                       |
| DNA/hAT-Blackjack   | 2                                         |
| DNA/hAT-Charlie     | 68                                        |
| DNA/hAT-Tip100      | 39                                        |
| DNA/hAT-hAT5        | 18                                        |
| DNA/hAT-hAT6        | 4                                         |
| DNA/hAT-hobo        | 1                                         |
| LINE/Dong-R4        | 37                                        |
| LINE/I              | 21                                        |
| LINE/L1             | 28                                        |
| LINE/L1-Tx1         | 7                                         |

|                   |     |
|-------------------|-----|
| LINE/L2           | 340 |
| LINE/Penelope     | 3   |
| LINE/R2-Hero      | 1   |
| LINE/RTE-BovB     | 112 |
| LINE/Rex-Babar    | 112 |
| LTR/Copia         | 1   |
| LTR/ERV1          | 12  |
| LTR/Gypsy         | 55  |
| LTR/Ngaro         | 14  |
| LTR/Pao           | 9   |
| RC/Helitron       | 38  |
| Retroposon        | 1   |
| SINE/tRNA-Core-L2 | 45  |
| SINE/tRNA-V       | 4   |
| SINE/tRNA-V-RTE   | 1   |
